# Supplementary material for: Examining Interactions of Uranyl(VI) Ions with Amino Acids in the Gas Phase
Source: MDPI journal article supplement (doi:10.3390/app13063834), 2023-03-17
Supplement: s1 [file s1]

# Supplementary Information

## Examining interactions of uranyl(VI) ions with amino acids in the gas phase

Ana F. Lucena,<sup>a,#</sup> Leonor Maria,<sup>a</sup> John K. Gibson,<sup>b</sup> Joaquim Marçalo<sup>a,\*</sup>

<sup>a</sup> *Centro de Química Estrutural, Institute of Molecular Sciences, Instituto Superior Técnico, Universidade de Lisboa, 2695-066 Bobadela LRS, Portugal*

<sup>b</sup> *Chemical Sciences Division, Lawrence Berkeley National Laboratory, Berkeley, California 94720, USA*

<sup>#</sup> *Present address: Reference Materials Unit, Joint Research Centre, European Commission, 2440 Geel, Belgium*

\* Correspondence: [jmarcalo@ctn.tecnico.ulisboa.pt](mailto:jmarcalo@ctn.tecnico.ulisboa.pt)

## Contents:

**Scheme S1.** Canonical structures of the studied amino acids: glycine, aspartic acid, cysteine, and histidine.

**Figure S1.** ESI-MS of a uranyl chloride + glycine solution (1:4) in positive ion mode.

**Figure S2.** ESI-MS of a uranyl chloride + aspartic acid solution (1:4) in positive ion mode.

**Figure S3.** ESI-MS of a uranyl chloride + histidine solution (1:4) in positive ion mode.

**Figure S4.** ESI-MS of a uranyl chloride + glycine solution (1:4) in negative ion mode.

**Figure S5.** ESI-MS of a uranyl chloride + aspartic acid solution (1:4) in negative ion mode.

**Figure S6.** ESI-MS of a uranyl chloride + cysteine solution (1:4) in negative ion mode.

**Table S1.** Main uranyl-amino acid complexes observed by ESI-MS in positive ion mode.

**Table S2.** Main uranyl-amino acid complexes observed by ESI-MS in negative ion mode.

**Scheme S2.** Canonical structure of cystine.

**Table S3.** Gas-phase data for the studied amino acids.

**Table S4.** Solution data for the studied amino acids.

**Figure S7.** CID mass spectrum of  $[\text{UO}_2(\text{Asp-H})(\text{Asp})_2]^+$ .

**Figure S8.** CID mass spectrum of  $[\text{UO}_2(\text{Cys-H})(\text{Cys})_2]^+$ .

**Figure S9.** CID mass spectrum of  $[\text{UO}_2(\text{His-H})(\text{His})_2]^+$ .

**Figure S10.** CID mass spectrum of  $[\text{UO}_2(\text{Cl})(\text{Asp})_2]^+$ .

**Figure S11.** CID mass spectrum of  $[\text{UO}_2(\text{Cl})(\text{Cys})_2]^+$ .

**Figure S12.** CID mass spectrum of  $[\text{UO}_2(\text{Cl})(\text{His})_2]^+$ .

**Figure S13.** CID mass spectrum of  $(\text{Gly}+\text{H})^+$ . Loss of  $\text{H}_2\text{O}+\text{CO}$  could not be observed due to a low  $m/z$  cut-off of 50.

**Figure S14.** CID mass spectrum of  $(\text{Asp}+\text{H})^+$ .

**Figure S15.** CID mass spectrum of  $(\text{Cys}+\text{H})^+$ .

**Figure S16.** CID mass spectrum of  $(\text{His}+\text{H})^+$ .

**Figure S17.** CID mass spectrum of  $[\text{UO}_2(\text{Asp-H})_3]^-$ .

**Figure S18.** CID mass spectrum of  $[\text{UO}_2(\text{Cys-H})_3]^-$ .

**Figure S19.** CID mass spectrum of  $[\text{UO}_2(\text{His-H})_3]^-$ .

**Figure S20.** CID mass spectrum of  $[\text{UO}_2(\text{Cl})(\text{Asp-H})_2]^-$ .

**Figure S21.** CID mass spectrum of  $[\text{UO}_2(\text{Cl})(\text{Cys-H})_2]^-$ .

**Figure S22.** CID mass spectrum of  $[\text{UO}_2(\text{Cl})(\text{His-H})_2]^-$ .

**Figure S23.** CID mass spectrum of  $[\text{UO}_2(\text{Cl})_2(\text{Asp-H})]^-$ .

**Figure S24.** CID mass spectrum of  $[\text{UO}_2(\text{Cl})_2(\text{Cys-H})]^-$ .

**Figure S25.** CID mass spectrum of  $[\text{UO}_2(\text{Cl})_2(\text{His-H})]^-$ .

**Figure S26.** ESI-MS of a uranyl chloride + glycine + aspartic acid solution (1:2:2) in positive ion mode.

**Figure S27.** ESI-MS of a uranyl chloride + glycine + cysteine solution (1:2:2) in positive ion mode.

**Figure S28.** ESI-MS of a uranyl chloride + glycine + histidine solution (1:2:2) in positive ion mode.

**Figure S29.** ESI-MS of a uranyl chloride + aspartic acid + cysteine solution (1:2:2) in positive ion mode.

**Figure S30.** ESI-MS of a uranyl chloride + aspartic acid + histidine solution (1:2:2) in positive ion mode.

**Figure S31.** ESI-MS of a uranyl chloride + cysteine + histidine solution (1:2:2) in positive ion mode.

**Figure S32.** ESI-MS of a uranyl chloride + glycine + aspartic acid solution (1:2:2) in negative ion mode.

**Figure S33.** ESI-MS of a uranyl chloride + glycine + cysteine solution (1:2:2) in negative ion mode.

**Figure S34.** ESI-MS of a uranyl chloride + glycine + histidine solution (1:2:2) in negative ion mode.

**Figure S35.** ESI-MS of a uranyl chloride + aspartic acid + cysteine solution (1:2:2) in negative ion mode.

**Figure S36.** ESI-MS of a uranyl chloride + aspartic acid + histidine solution (1:2:2) in negative ion mode.

**Figure S37.** ESI-MS of a uranyl chloride + cysteine + histidine solution (1:2:2) in negative ion mode.

**Figure S38.** CID mass spectrum of  $[\text{UO}_2(\text{Asp-H})(\text{Gly})_2]^+$ .

**Figure S39.** CID mass spectrum of  $[\text{UO}_2(\text{Cys-H})(\text{Gly})_2]^+$ .

**Figure S40.** CID mass spectrum of  $[\text{UO}_2(\text{His-H})(\text{Gly})_2]^+$ .

**Figure S41.** CID mass spectrum of  $[\text{UO}_2(\text{Asp-H})(\text{Asp})(\text{Gly})]^+$ .

**Figure S42.** CID mass spectrum of  $[\text{UO}_2(\text{Cys-H})(\text{Cys})(\text{Gly})]^+$ .

**Figure S43.** CID mass spectrum of  $[\text{UO}_2(\text{His-H})(\text{His})(\text{Gly})]^+$ .

**Figure S44.** CID mass spectrum of  $[\text{UO}_2(\text{Asp-H})(\text{Asp})(\text{Cys})]^+$ .

**Figure S45.** CID mass spectrum of  $[\text{UO}_2(\text{Asp-H})(\text{Cys})_2]^+$ .

**Figure S46.** CID mass spectrum of  $[\text{UO}_2(\text{Asp-H})(\text{Asp})(\text{His})]^+$ .

**Figure S47.** CID mass spectrum of  $[\text{UO}_2(\text{Asp-H})(\text{His})_2]^+$ .

**Figure S48.** CID mass spectrum of  $[\text{UO}_2(\text{His-H})(\text{Cys})_2]^+$ .

**Figure S49.** CID mass spectrum of  $[\text{UO}_2(\text{His-H})(\text{Cys})(\text{His})]^+$ .

**Figure S50.** CID mass spectrum of  $[\text{UO}_2(\text{Cl})(\text{Asp-H})(\text{Gly-H})]^-$ .

**Figure S51.** CID mass spectrum of  $[\text{UO}_2(\text{Cl})(\text{Cys-H})(\text{Gly-H})]^-$ .

**Figure S52.** CID mass spectrum of  $[\text{UO}_2(\text{Cl})(\text{His-H})(\text{Gly-H})]^-$ .

**Figure S53.** CID mass spectrum of  $[\text{UO}_2(\text{Cl})(\text{Asp-H})(\text{Cys-H})]^-$ .

**Figure S54.** CID mass spectrum of  $[\text{UO}_2(\text{Cl})(\text{Asp-H})(\text{His-H})]^-$ .

**Figure S55.** CID mass spectrum of  $[\text{UO}_2(\text{Cl})(\text{Asp-H})(\text{His-H})]^-$ .

**Figure S56.** CID mass spectrum of  $[\text{UO}_2(\text{Asp-H})(\text{Gly-H})_2]^-$ .

**Figure S57.** CID mass spectrum of  $[\text{UO}_2(\text{Asp-H})_2(\text{Gly-H})]^-$ .

**Figure S58.** CID mass spectrum of  $[\text{UO}_2(\text{Cys-H})(\text{Gly-H})_2]^-$ .

**Figure S59.** CID mass spectrum of  $[\text{UO}_2(\text{Cys-H})_2(\text{Gly-H})]^-$ .

**Figure S60.** CID mass spectrum of  $[\text{UO}_2(\text{His-H})(\text{Gly-H})_2]^-$ .

**Figure S61.** CID mass spectrum of  $[\text{UO}_2(\text{His-H})_2(\text{Gly-H})]^-$ .

**Figure S62.** CID mass spectrum of  $[\text{UO}_2(\text{Asp-H})(\text{Cys-H})_2]^-$ .

**Figure S63.** CID mass spectrum of  $[\text{UO}_2(\text{Asp-H})_2(\text{Cys-H})]^-$ .

**Figure S64.** CID mass spectrum of  $[\text{UO}_2(\text{Asp-H})(\text{His-H})_2]^-$ .

**Figure S65.** CID mass spectrum of  $[\text{UO}_2(\text{Asp-H})_2(\text{His-H})]^-$ .

**Figure S66.** CID mass spectrum of  $[\text{UO}_2(\text{Cys-H})(\text{His-H})_2]^-$ .

**Figure S67.** CID mass spectrum of  $[\text{UO}_2(\text{Cys-H})_2(\text{His-H})]^-$ .

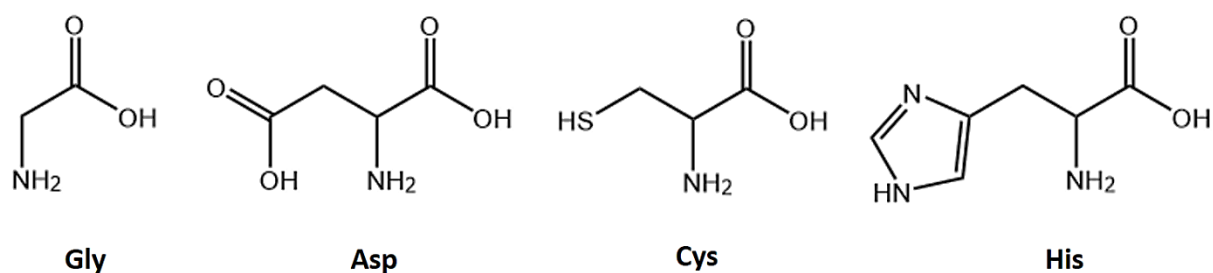

**Scheme S1.** Canonical structures of the studied amino acids: glycine, aspartic acid, cysteine, and histidine.

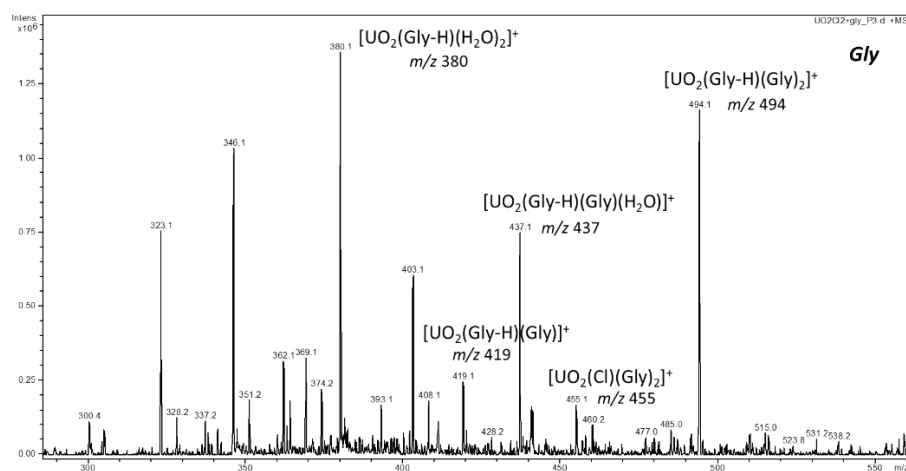

**Figure S1.** ESI-MS of a uranyl chloride + glycine solution (1:4) in positive ion mode.

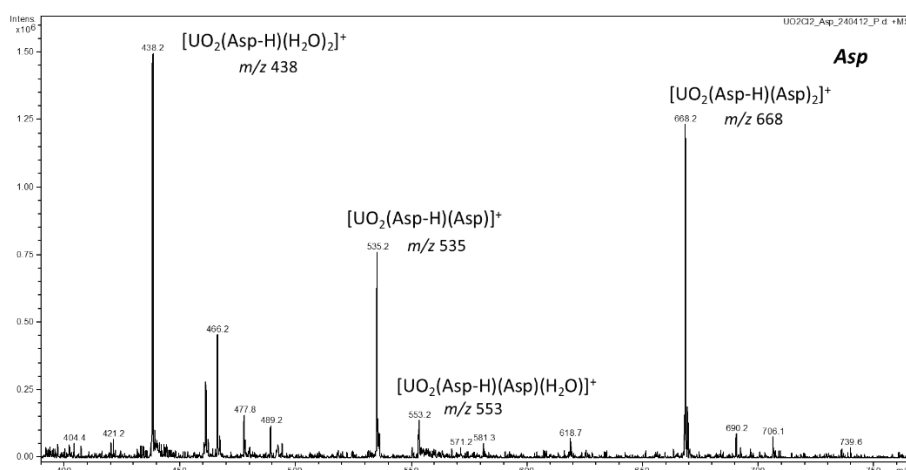

**Figure S2.** ESI-MS of a uranyl chloride + aspartic acid solution (1:4) in positive ion mode.

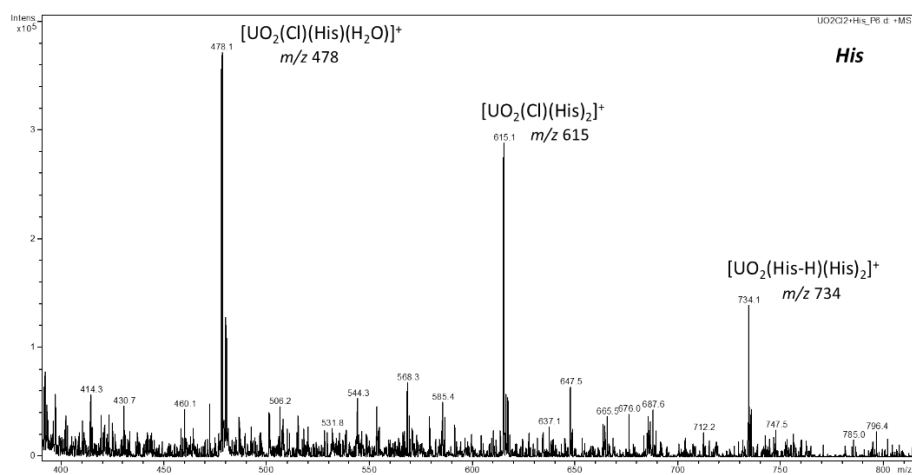

**Figure S3.** ESI-MS of a uranyl chloride + histidine solution (1:4) in positive ion mode.

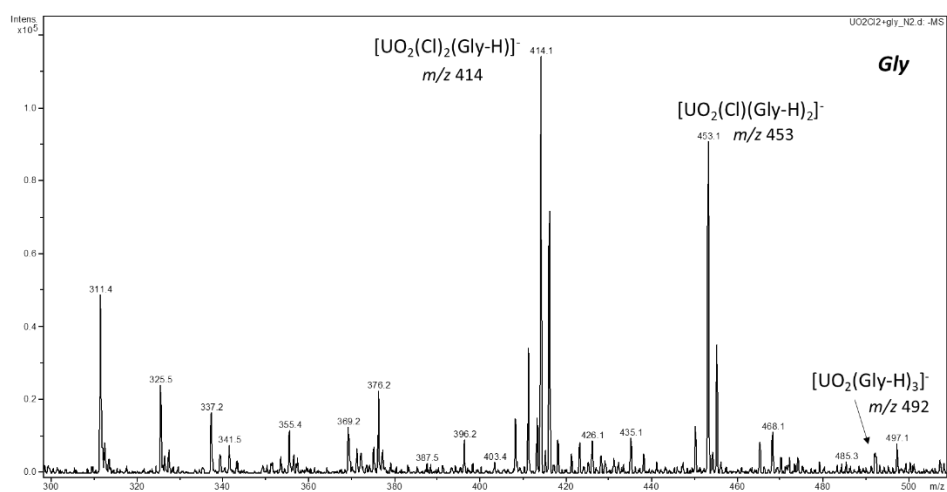

**Figure S4.** ESI-MS of a uranyl chloride + glycine solution (1:4) in negative ion mode.

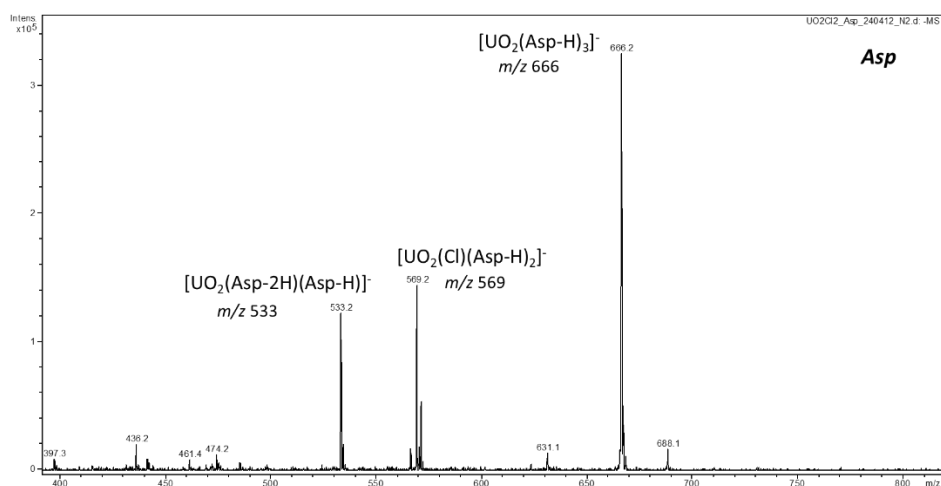

**Figure S5.** ESI-MS of a uranyl chloride + aspartic acid solution (1:4) in negative ion mode.

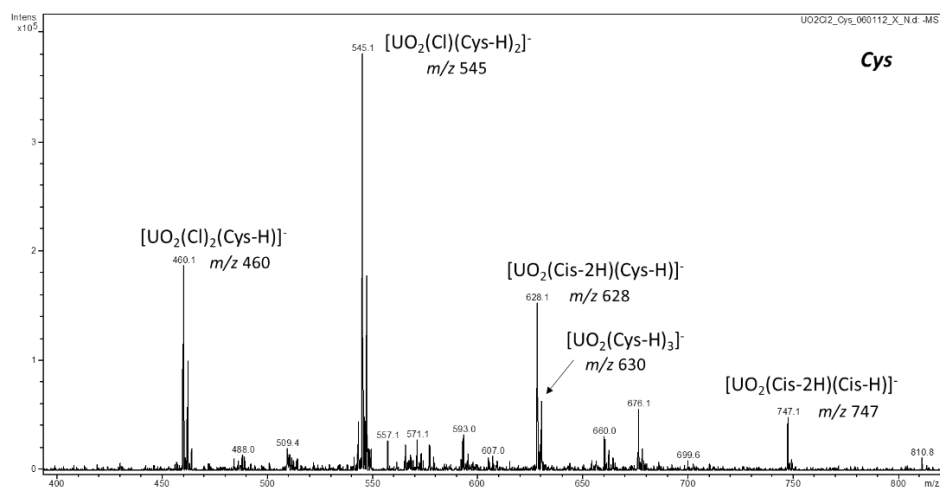

**Figure S6.** ESI-MS of a uranyl chloride + cysteine solution (1:4) in negative ion mode.

**Table S1.** Main uranyl-amino acid complexes observed by ESI-MS in positive ion mode.

| Amino acid    | Complex                                       | Calculated $m/z$ | Observed $m/z$ |
|---------------|-----------------------------------------------|------------------|----------------|
| Glycine       | $[\text{UO}_2(\text{Cl})(\text{Gly})]^+$      | 380.041          | -              |
|               | $[\text{UO}_2(\text{Gly-H})(\text{Gly})]^+$   | 419.096          | 419.1          |
|               | $[\text{UO}_2(\text{Cl})(\text{Gly})_2]^+$    | 455.073          | 455.1          |
|               | $[\text{UO}_2(\text{Gly-H})(\text{Gly})_2]^+$ | 494.128          | 494.1          |
| Aspartic acid | $[\text{UO}_2(\text{Cl})(\text{Asp})]^+$      | 438.046          | -              |
|               | $[\text{UO}_2(\text{Asp-H})(\text{Asp})]^+$   | 535.107          | 535.2          |
|               | $[\text{UO}_2(\text{Cl})(\text{Asp})_2]^+$    | 571.084          | 571.2          |
|               | $[\text{UO}_2(\text{Asp-H})(\text{Asp})_2]^+$ | 668.145          | 668.2          |
| Cysteine      | $[\text{UO}_2(\text{Cl})(\text{Cys})]^+$      | 426.029          | 426.2          |
|               | $[\text{UO}_2(\text{Cys-H})(\text{Cys})]^+$   | 511.072          | 511.2          |
|               | $[\text{UO}_2(\text{Cl})(\text{Cys})_2]^+$    | 547.048          | 547.1          |
|               | $[\text{UO}_2(\text{Cys-H})(\text{Cys})_2]^+$ | 632.091          | 632.2          |
| Histidine     | $[\text{UO}_2(\text{Cl})(\text{His})]^+$      | 460.078          | -              |
|               | $[\text{UO}_2(\text{His-H})(\text{His})]^+$   | 579.171          | -              |
|               | $[\text{UO}_2(\text{Cl})(\text{His})_2]^+$    | 615.148          | 615.1          |
|               | $[\text{UO}_2(\text{His-H})(\text{His})_2]^+$ | 734.241          | 734.1          |

**Table S2.** Main uranyl-amino acid complexes observed by ESI-MS in negative ion mode.

| Amino acid    | Complex                                      | Calculated $m/z$ | Observed $m/z$ |
|---------------|----------------------------------------------|------------------|----------------|
| Glycine       | $[\text{UO}_2(\text{Cl})_2(\text{Gly-H})]^-$ | 414.002          | 414.1          |
|               | $[\text{UO}_2(\text{Cl})(\text{Gly-H})_2]^-$ | 453.057          | 453.1          |
|               | $[\text{UO}_2(\text{Gly-H})_3]^-$            | 492.113          | 492.2          |
| Aspartic acid | $[\text{UO}_2(\text{Cl})_2(\text{Asp-H})]^-$ | 472.007          | 472.1          |
|               | $[\text{UO}_2(\text{Cl})(\text{Asp-H})_2]^-$ | 569.068          | 569.2          |
|               | $[\text{UO}_2(\text{Asp-H})_3]^-$            | 666.129          | 666.2          |
| Cysteine      | $[\text{UO}_2(\text{Cl})_2(\text{Cys-H})]^-$ | 459.990          | 460.1          |
|               | $[\text{UO}_2(\text{Cl})(\text{Cys-H})_2]^-$ | 545.033          | 545.1          |
|               | $[\text{UO}_2(\text{Cys-H})_3]^-$            | 630.076          | 630.1          |
| Histidine     | $[\text{UO}_2(\text{Cl})_2(\text{His-H})]^-$ | 494.039          | 494.1          |
|               | $[\text{UO}_2(\text{Cl})(\text{His-H})_2]^-$ | 613.132          | 613.2          |
|               | $[\text{UO}_2(\text{His-H})_3]^-$            | 732.225          | 732.2          |

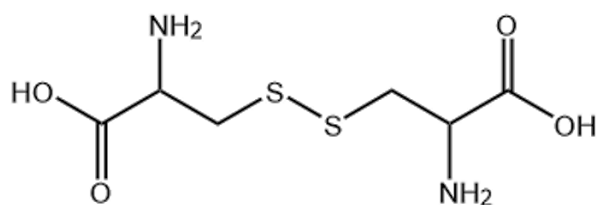**Cis****Scheme S2.** Canonical structure of cystine.**Table S3.** Gas-phase data for the studied amino acids.

| Amino acid    | Symbol | Gas-phase acidity (GA) <sup>1</sup><br>[kJ/mol] | Proton affinity (PA) <sup>2</sup><br>[kJ/mol] | Gas-phase basicity (GB) <sup>2</sup><br>[kJ/mol] |
|---------------|--------|-------------------------------------------------|-----------------------------------------------|--------------------------------------------------|
| Glycine       | Gly    | 1434                                            | 886.5                                         | 852.2                                            |
| Aspartic acid | Asp    | 1345                                            | 908.9                                         | 875.0                                            |
| Cysteine      | Cys    | 1395                                            | 903.2                                         | 869.3                                            |
| Histidine     | His    | 1375                                            | 988.0                                         | 950.2                                            |

1. Jones, C.M.; Bernier, M.; Carson, E.; Colyer, K.E.; Metz, R.; Pawlow, A.; Wischow, E.D.; Webb, I.; Andriole, E.J.; Poutsma, J.C., Gas-phase Acidities of the 20 Protein Amino Acids. *Int. J. Mass Spectrom.* 2007, 267, 54-62. <https://doi.org/10.1016/j.ijms.2007.02.018>.

2. Hunter, E.P.; Lias, S.G., Evaluated Gas Phase Basicities and Proton Affinities of Molecules: An Update. *J. Phys. Chem. Ref. Data* 1998, 27, 413-656. <https://doi.org/10.1063/1.556018>.

**Table S4.** Solution data for the studied amino acids.<sup>1</sup>

| Amino acid    | Symbol | $pK_a$ | $pK_b$ | $pK_c$ |
|---------------|--------|--------|--------|--------|
| Glycine       | Gly    | 2.34   | 9.58   | -      |
| Aspartic acid | Asp    | 1.95   | 9.66   | 3.71   |
| Cysteine      | Cys    | 1.91   | 10.28  | 8.14   |
| Histidine     | His    | 1.70   | 9.09   | 6.04   |

1. Haynes, W.M.; Lide, D.R.; Bruno, T.J. (Eds.), *CRC Handbook of Chemistry and Physics*, 97th edition, CRC Press, Boca Raton, FL, USA, 2017.

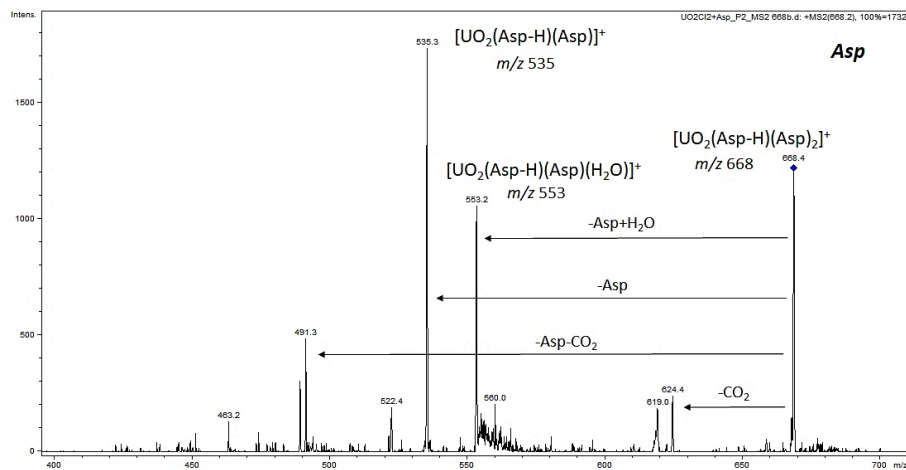

**Figure S7.** CID mass spectrum of  $[\text{UO}_2(\text{Asp-H})(\text{Asp})_2]^+$ .

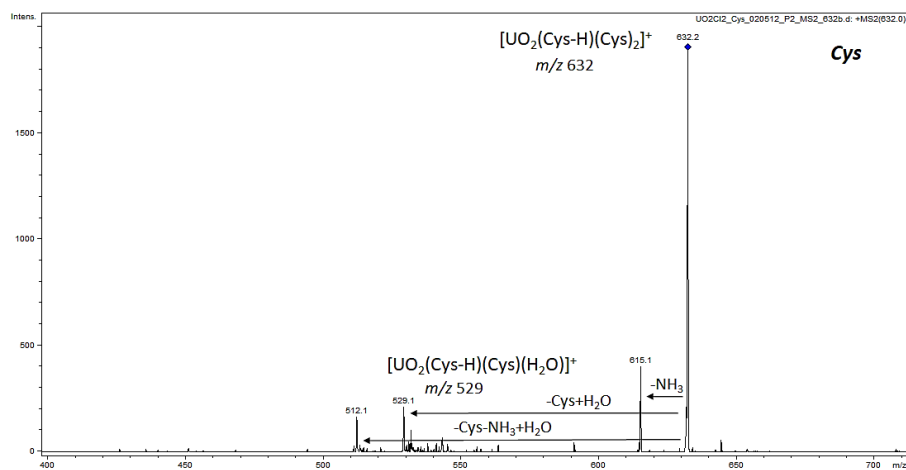

**Figure S8.** CID mass spectrum of  $[\text{UO}_2(\text{Cys-H})(\text{Cys})_2]^+$ .

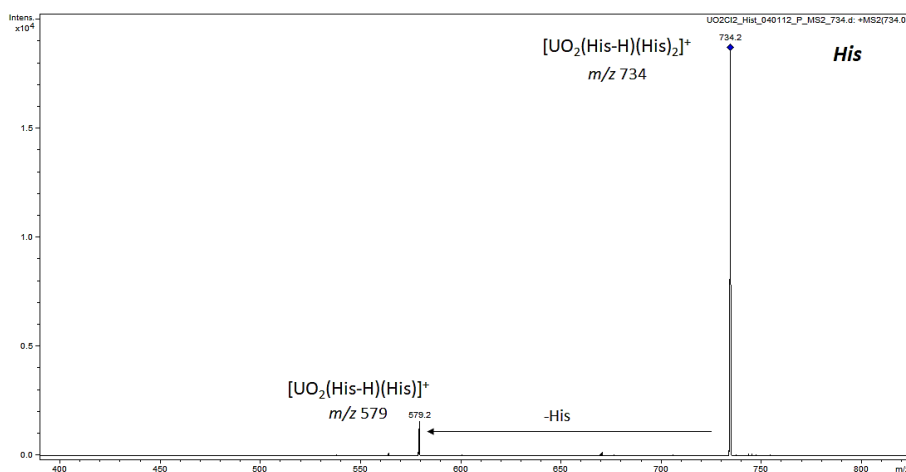

**Figure S9.** CID mass spectrum of  $[\text{UO}_2(\text{His-H})(\text{His})_2]^+$ .



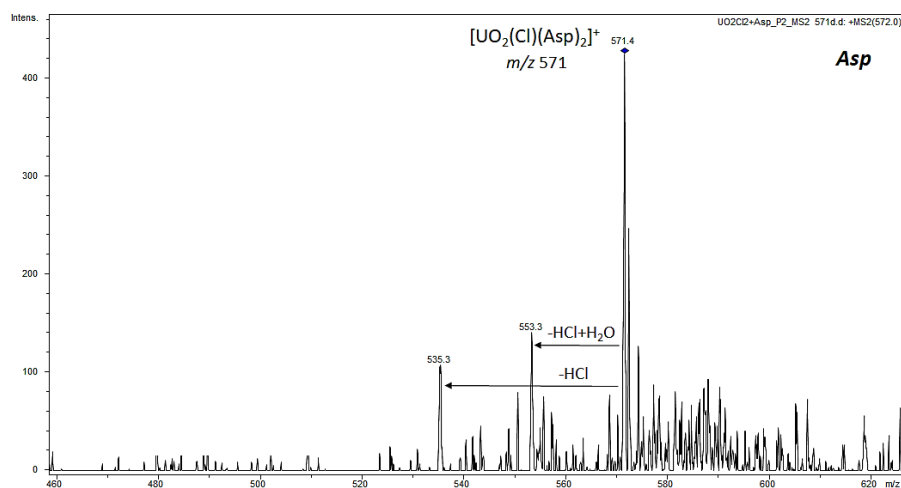

**Figure S10.** CID mass spectrum of  $[\text{UO}_2(\text{Cl})(\text{Asp})_2]^+$ .

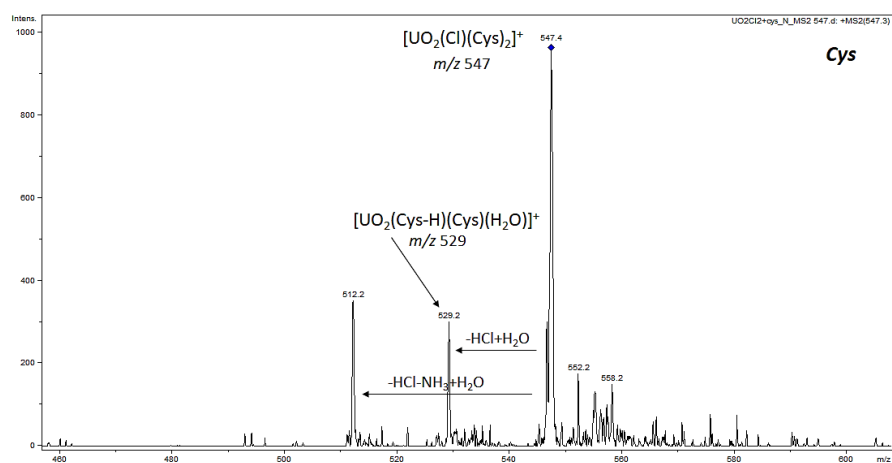

**Figure S11.** CID mass spectrum of  $[\text{UO}_2(\text{Cl})(\text{Cys})_2]^+$ .

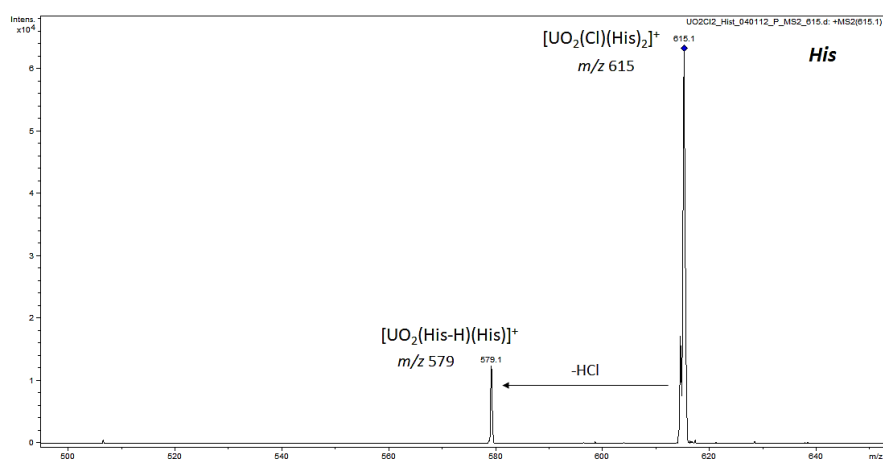

**Figure S12.** CID mass spectrum of  $[\text{UO}_2(\text{Cl})(\text{His})_2]^+$ .

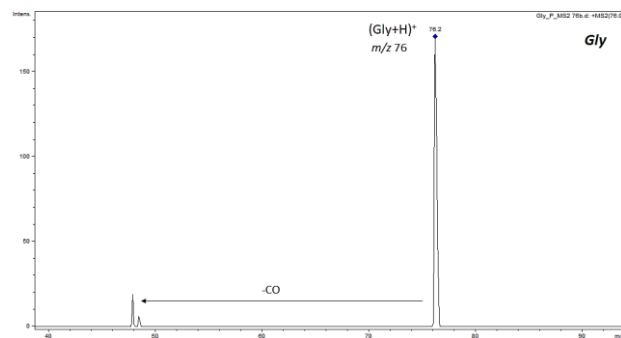

**Figure S13.** CID mass spectrum of (Gly+H)<sup>+</sup>. Loss of H<sub>2</sub>O+CO could not be observed due to a low *m/z* cut-off of 50.

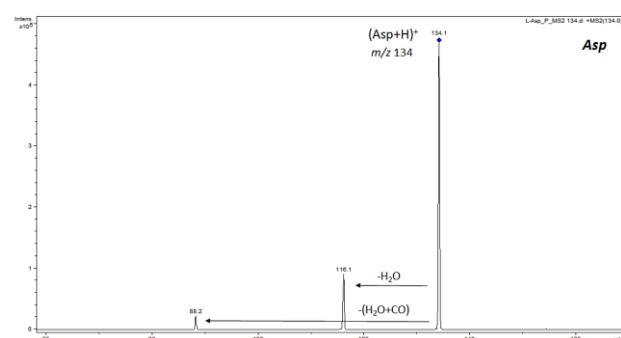

**Figure S14.** CID mass spectrum of (Asp+H)<sup>+</sup>.

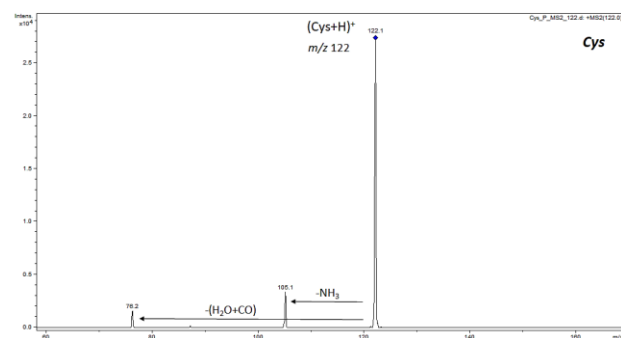

**Figure S15.** CID mass spectrum of (Cys+H)<sup>+</sup>.

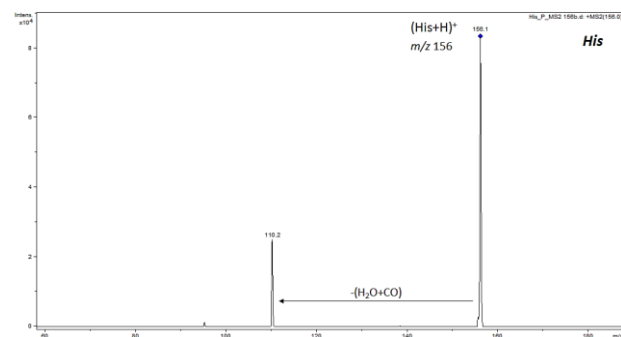

**Figure S16.** CID mass spectrum of (His+H)<sup>+</sup>.

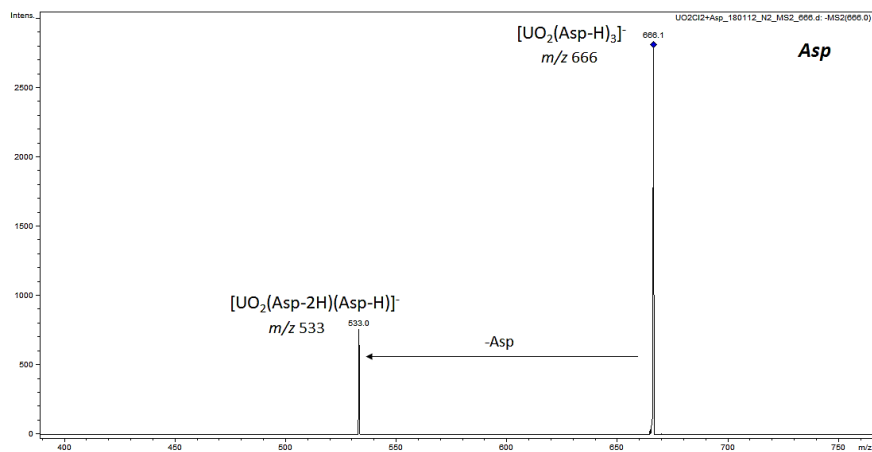

Figure S17. CID mass spectrum of  $[\text{UO}_2(\text{Asp-H})_3]^-$ .

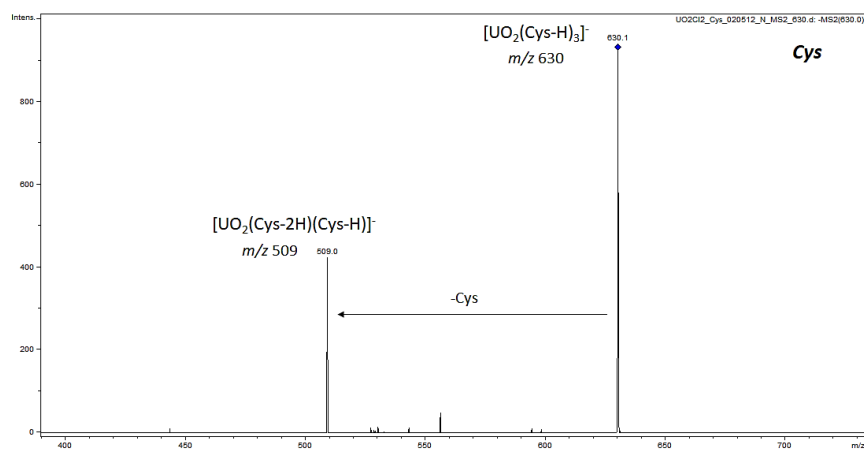

Figure S18. CID mass spectrum of  $[\text{UO}_2(\text{Cys-H})_3]^-$ .

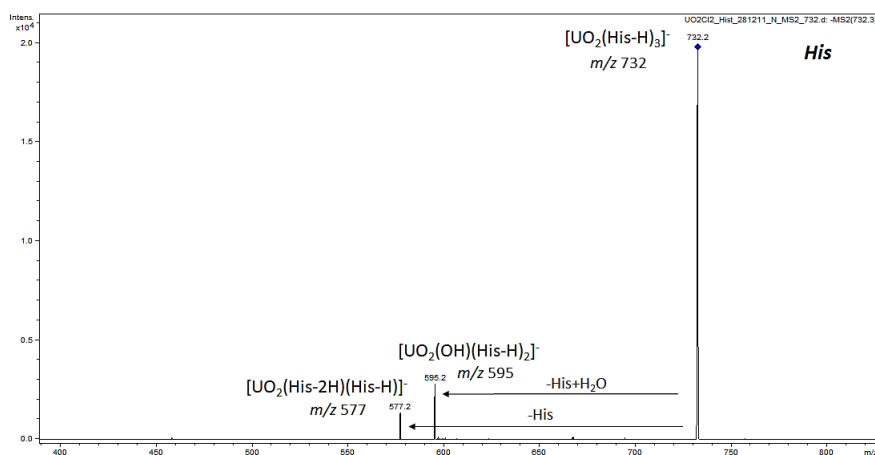

Figure S19. CID mass spectrum of  $[\text{UO}_2(\text{His-H})_3]^-$ .

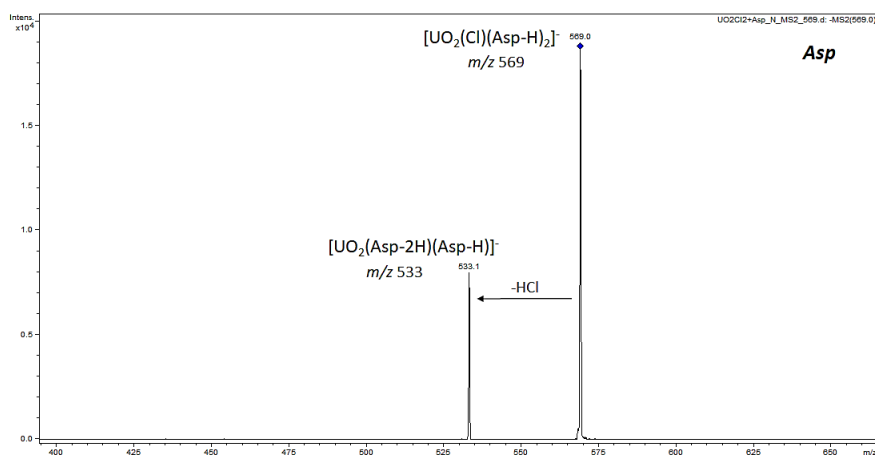

Figure S20. CID mass spectrum of  $[\text{UO}_2(\text{Cl})(\text{Asp-H})_2]^-$ .

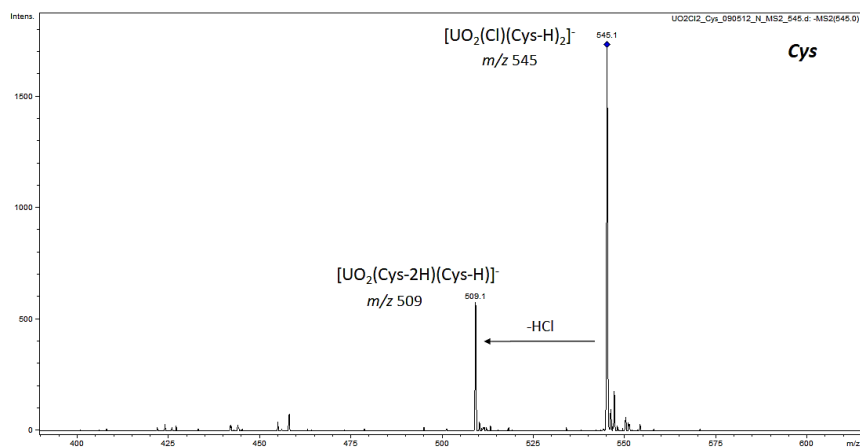

Figure S21. CID mass spectrum of  $[\text{UO}_2(\text{Cl})(\text{Cys-H})_2]^-$ .

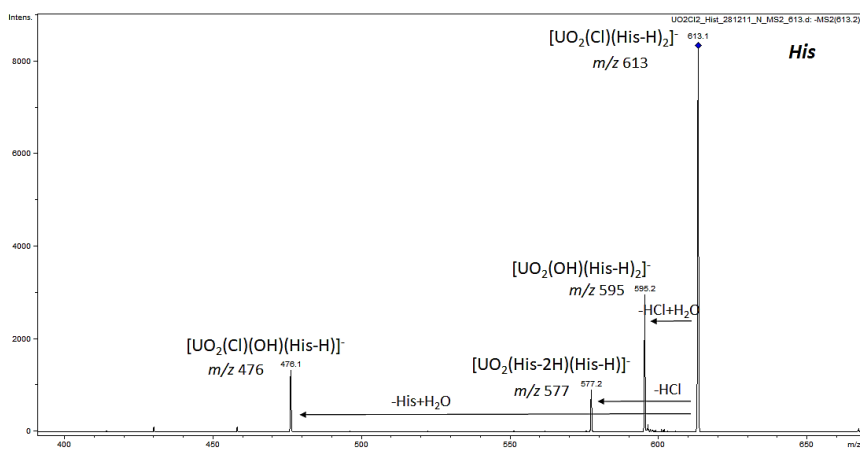

Figure S22. CID mass spectrum of  $[\text{UO}_2(\text{Cl})(\text{His-H})_2]^-$ .

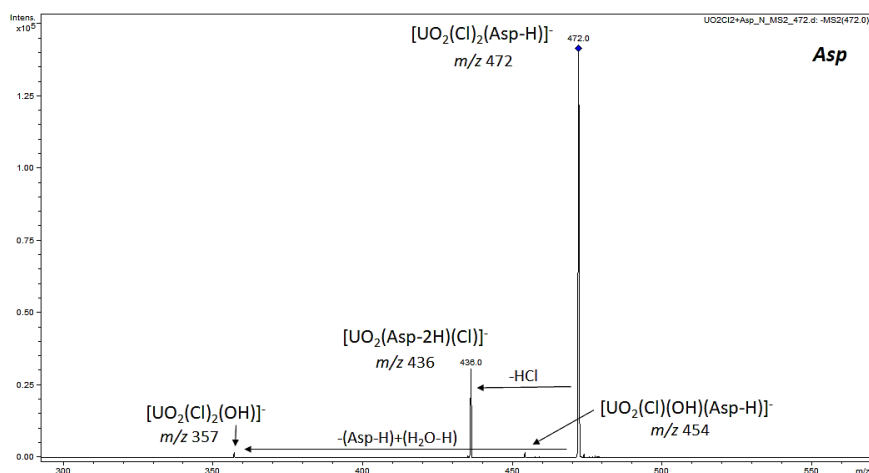

Figure S23. CID mass spectrum of  $[\text{UO}_2(\text{Cl})_2(\text{Asp-H})]^-$ .

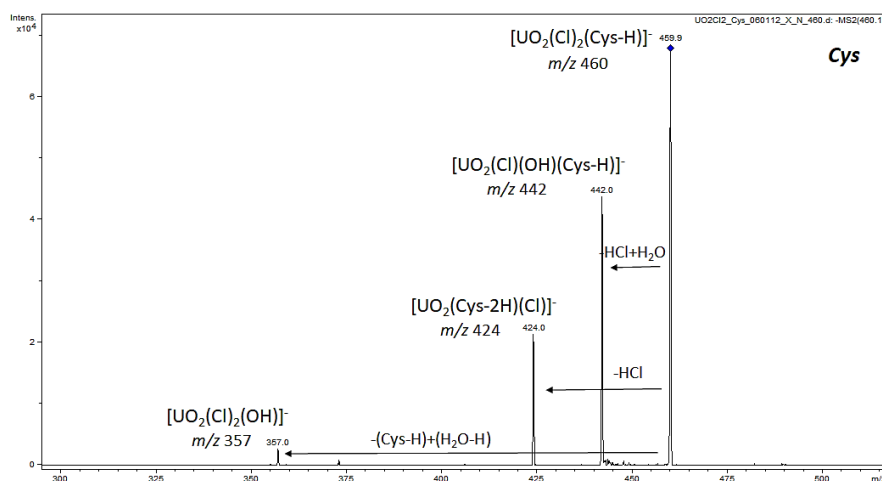

Figure S24. CID mass spectrum of  $[\text{UO}_2(\text{Cl})_2(\text{Cys-H})]^-$ .

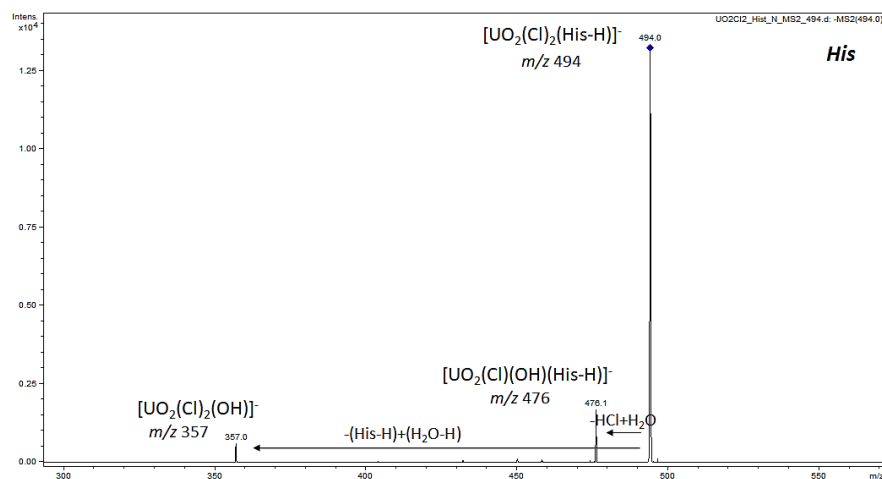

Figure S25. CID mass spectrum of  $[\text{UO}_2(\text{Cl})_2(\text{His-H})]^-$ .

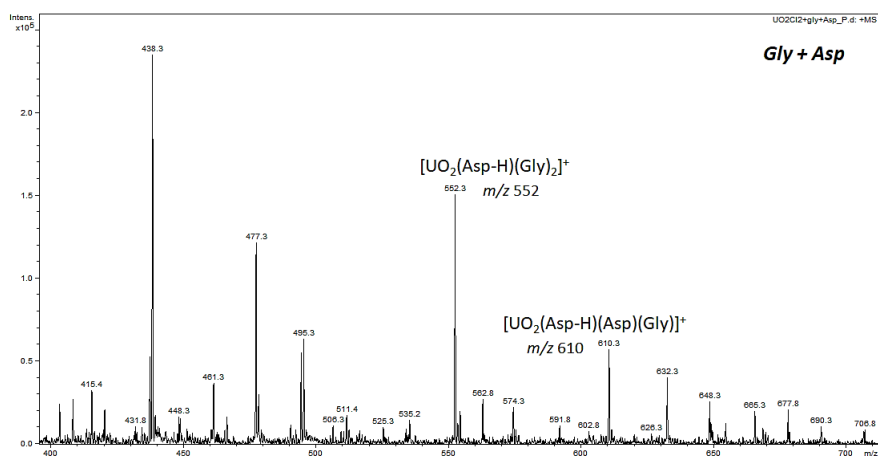

**Figure S26.** ESI-MS of a uranyl chloride + glycine + aspartic acid solution (1:2:2) in positive ion mode.

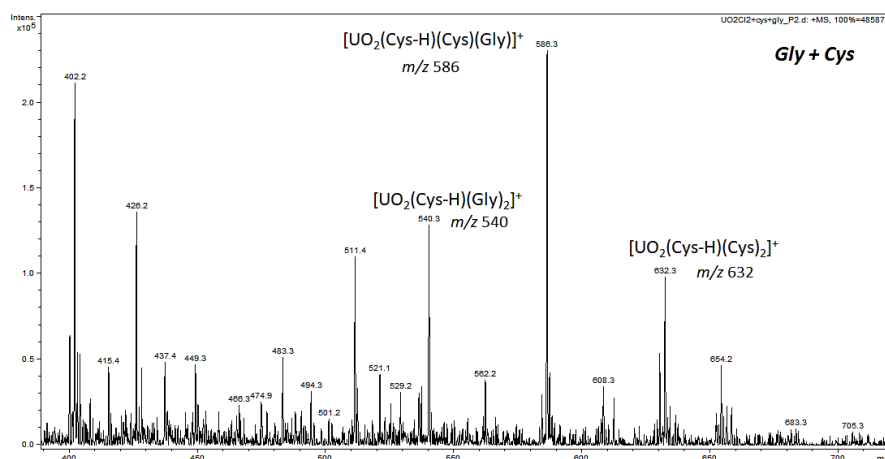

**Figure S27.** ESI-MS of a uranyl chloride + glycine + cysteine solution (1:2:2) in positive ion mode.

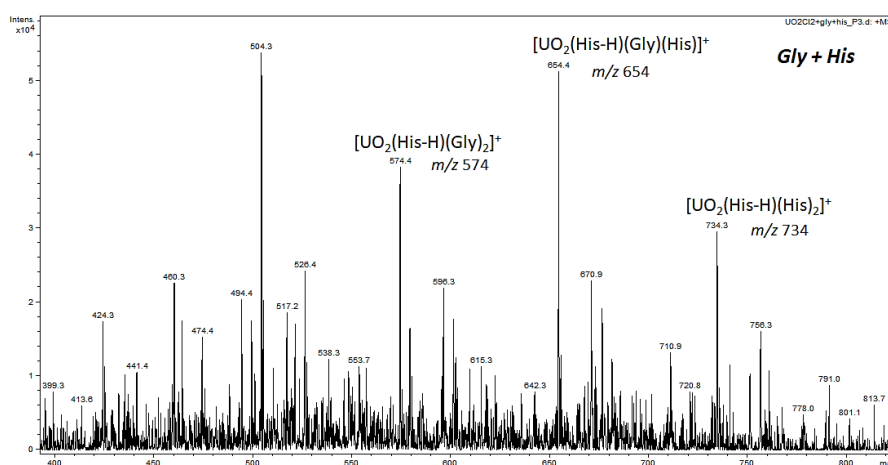

**Figure S28.** ESI-MS of a uranyl chloride + glycine + histidine solution (1:2:2) in positive ion mode.

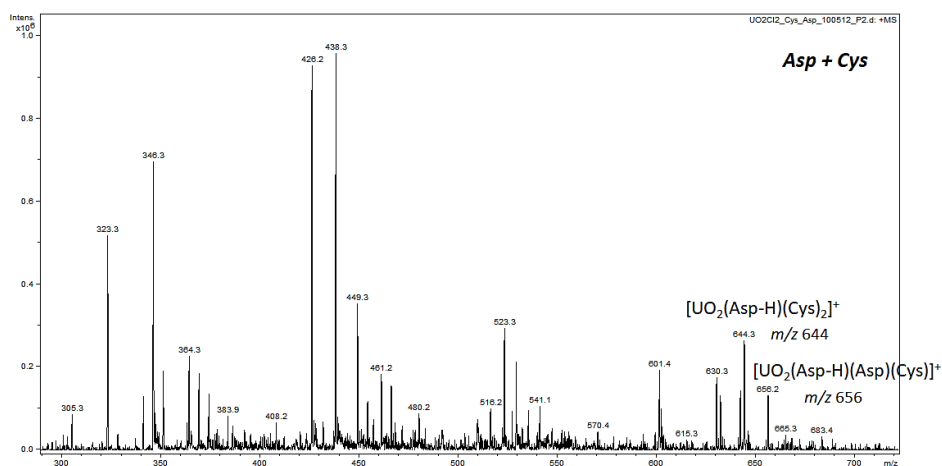

**Figure S29.** ESI-MS of a uranyl chloride + aspartic acid + cysteine solution (1:2:2) in positive ion mode.

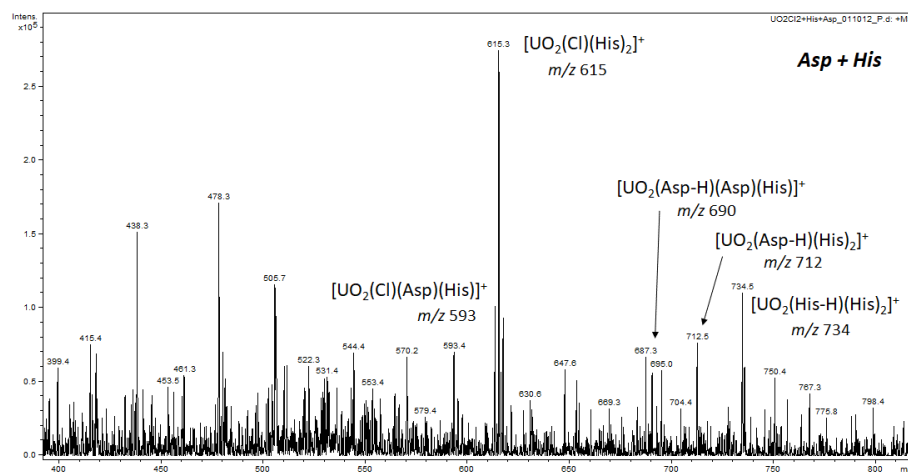

**Figure S30.** ESI-MS of a uranyl chloride + aspartic acid + histidine solution (1:2:2) in positive ion mode.

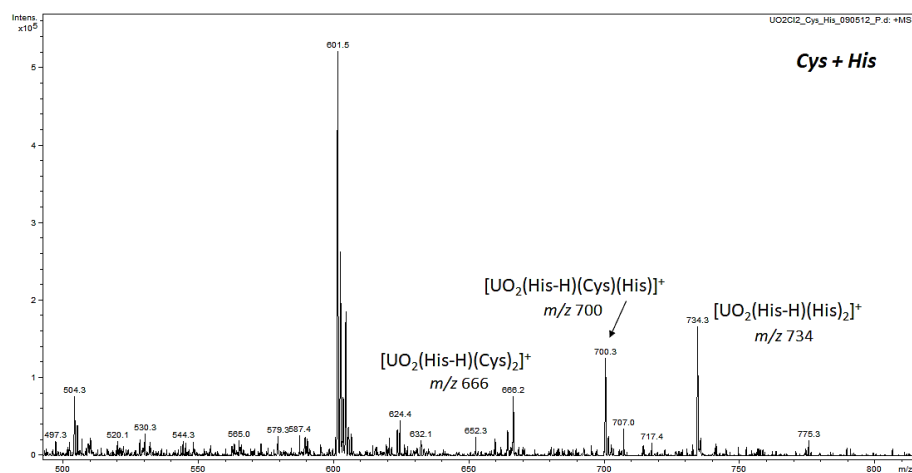

**Figure S31.** ESI-MS of a uranyl chloride + cysteine + histidine solution (1:2:2) in positive ion mode.

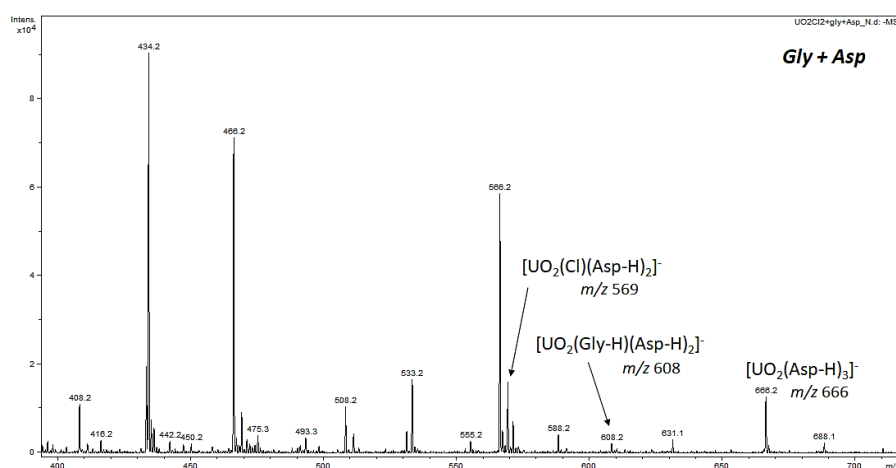

**Figure S32.** ESI-MS of a uranyl chloride + glycine + aspartic acid solution (1:2:2) in negative ion mode.

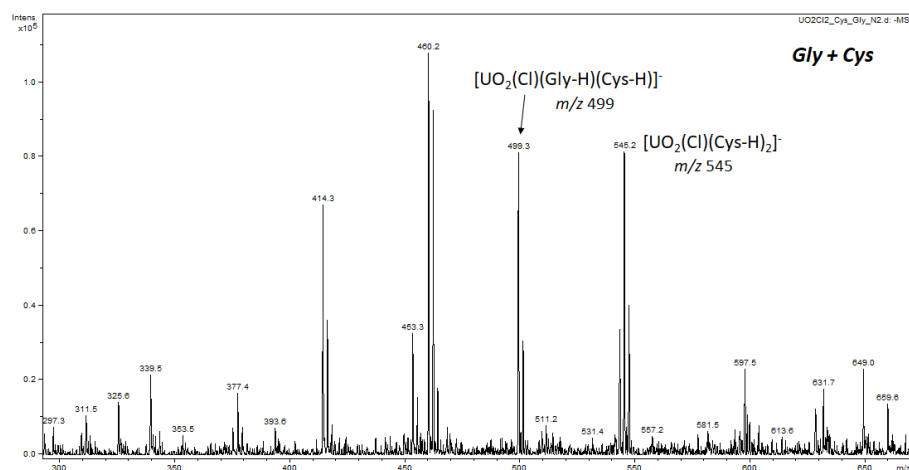

**Figure S33.** ESI-MS of a uranyl chloride + glycine + cysteine solution (1:2:2) in negative ion mode.

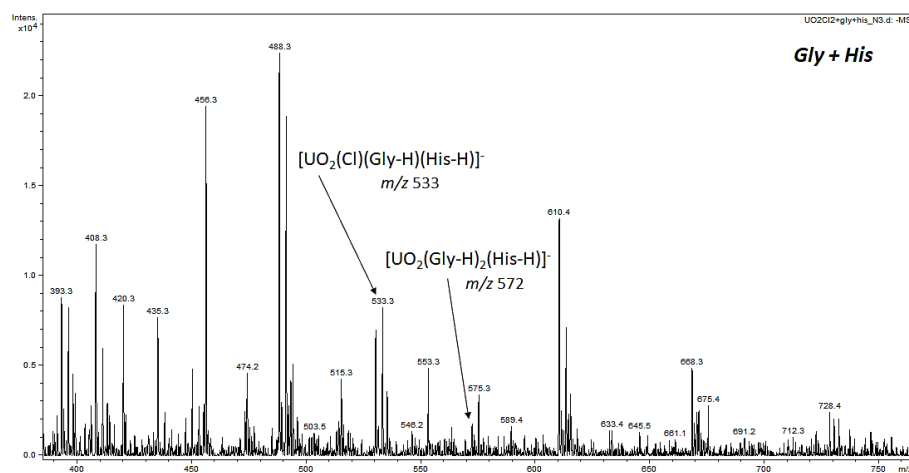

**Figure S34.** ESI-MS of a uranyl chloride + glycine + histidine solution (1:2:2) in negative ion mode.



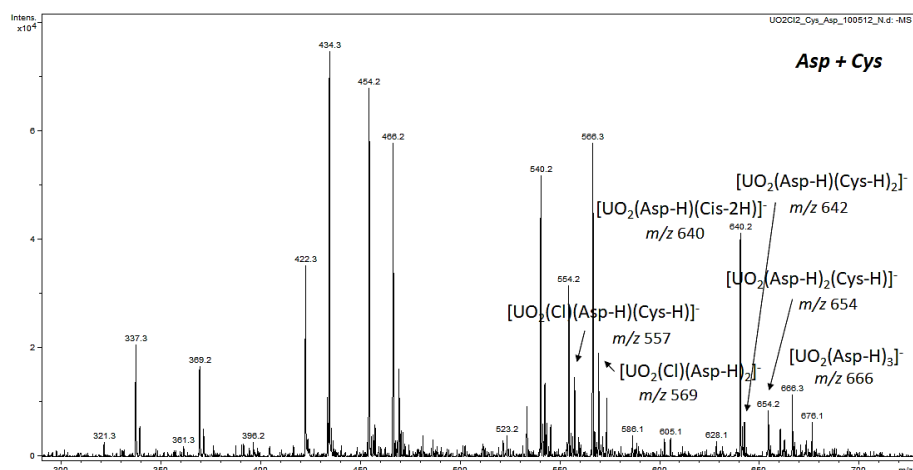

Figure S35. ESI-MS of a uranyl chloride + aspartic acid + cysteine solution (1:2:2) in negative ion mode.

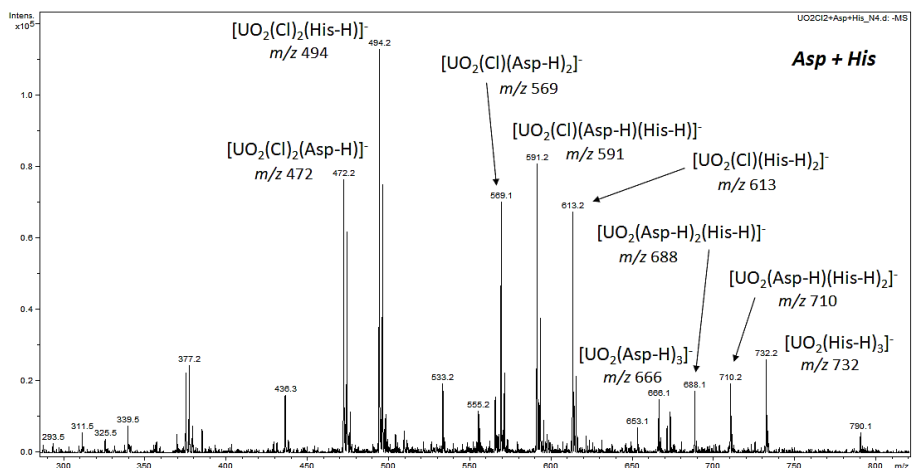

Figure S36. ESI-MS of a uranyl chloride + aspartic acid + histidine solution (1:2:2) in negative ion mode.

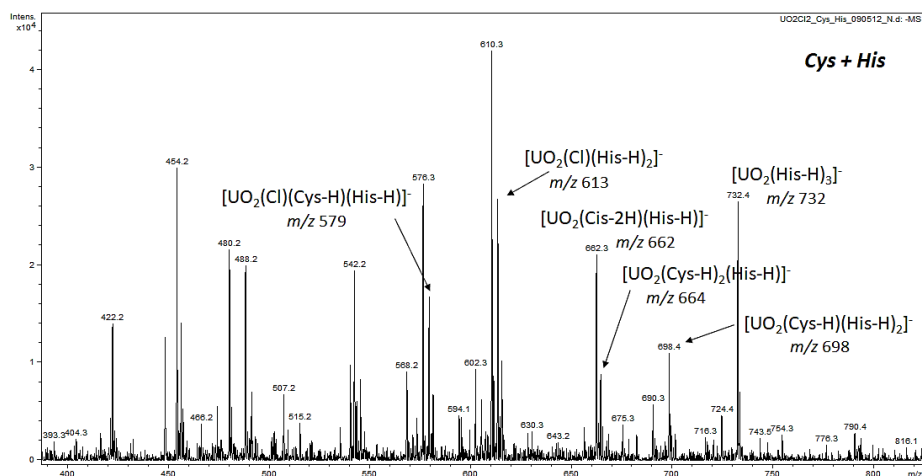

Figure S37. ESI-MS of a uranyl chloride + cysteine + histidine solution (1:2:2) in negative ion mode.

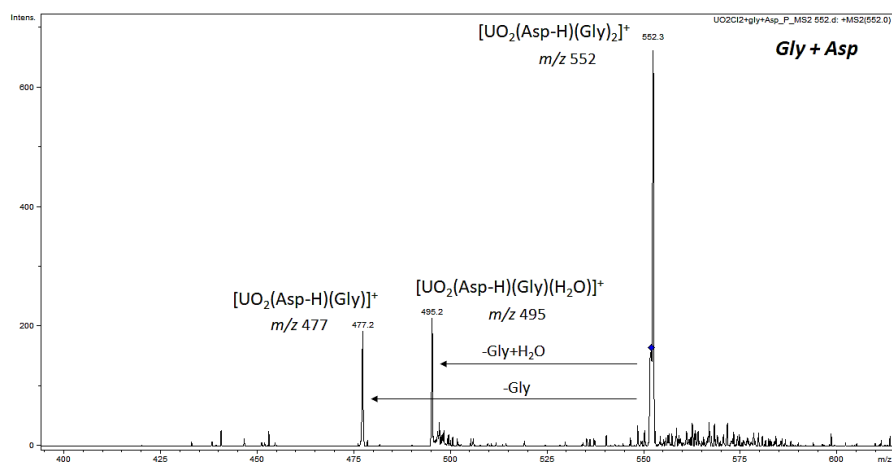

**Figure S38.** CID mass spectrum of  $[\text{UO}_2(\text{Asp-H})(\text{Gly})_2]^+$ .

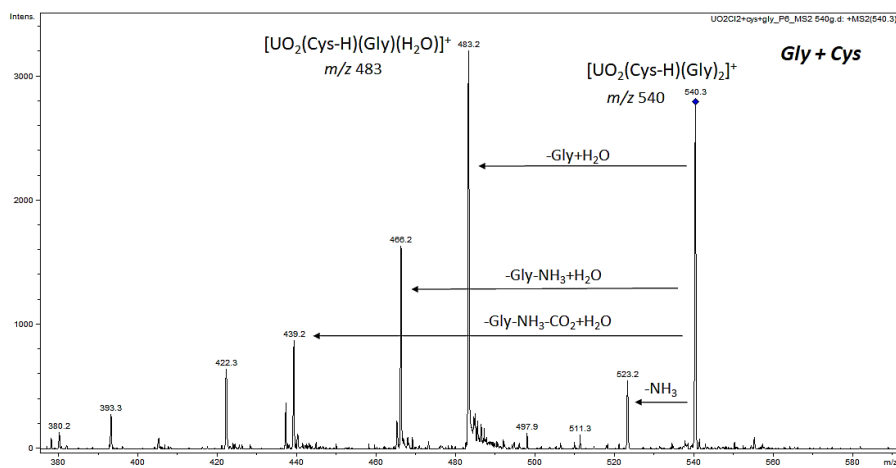

**Figure S39.** CID mass spectrum of  $[\text{UO}_2(\text{Cys-H})(\text{Gly})_2]^+$ .

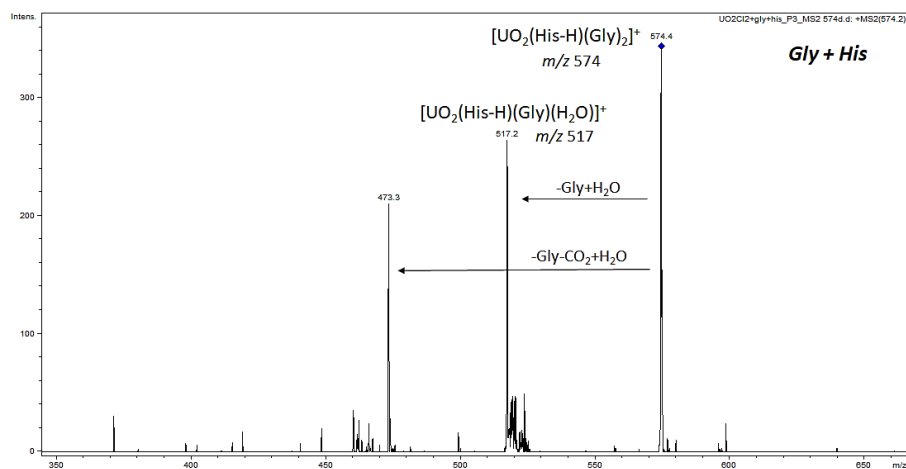

**Figure S40.** CID mass spectrum of  $[\text{UO}_2(\text{His-H})(\text{Gly})_2]^+$ .

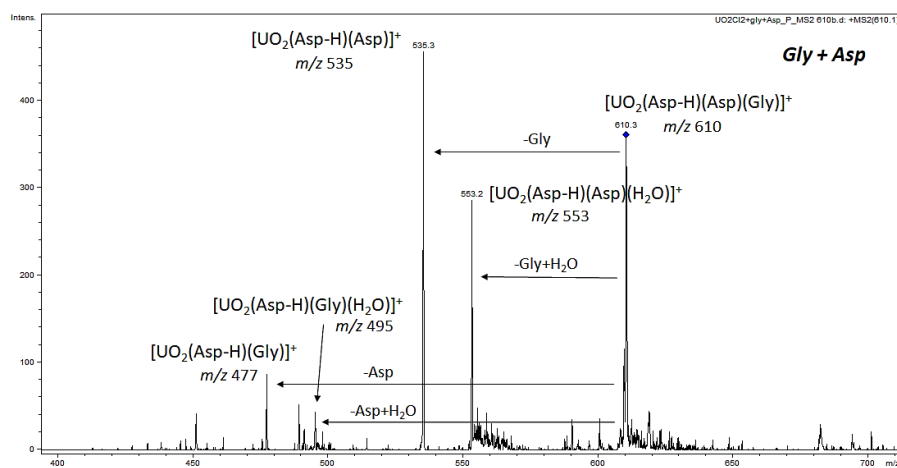

Figure S41. CID mass spectrum of  $[\text{UO}_2(\text{Asp-H})(\text{Asp})(\text{Gly})]^+$ .

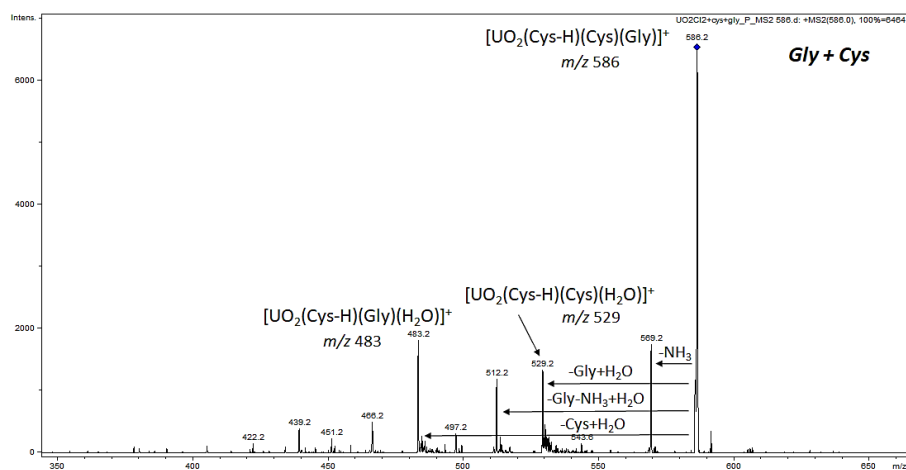

Figure S42. CID mass spectrum of  $[\text{UO}_2(\text{Cys-H})(\text{Cys})(\text{Gly})]^+$ .

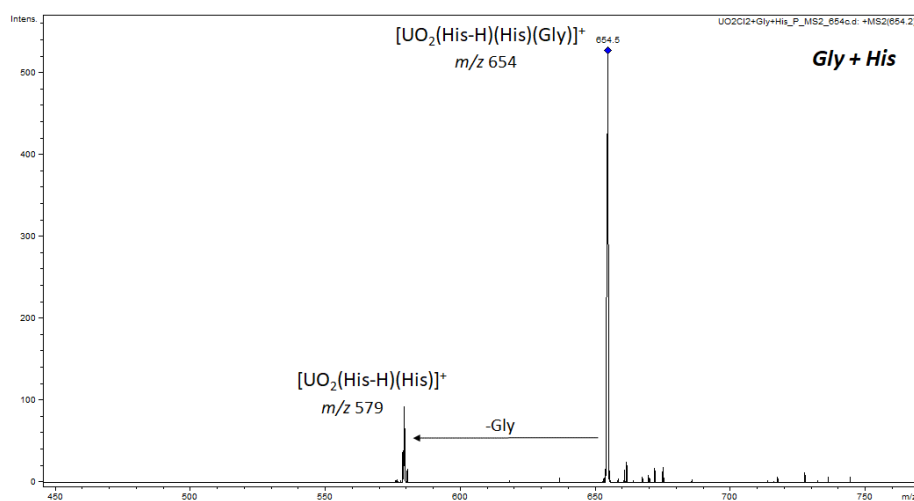

Figure S43. CID mass spectrum of  $[\text{UO}_2(\text{His-H})(\text{His})(\text{Gly})]^+$ .

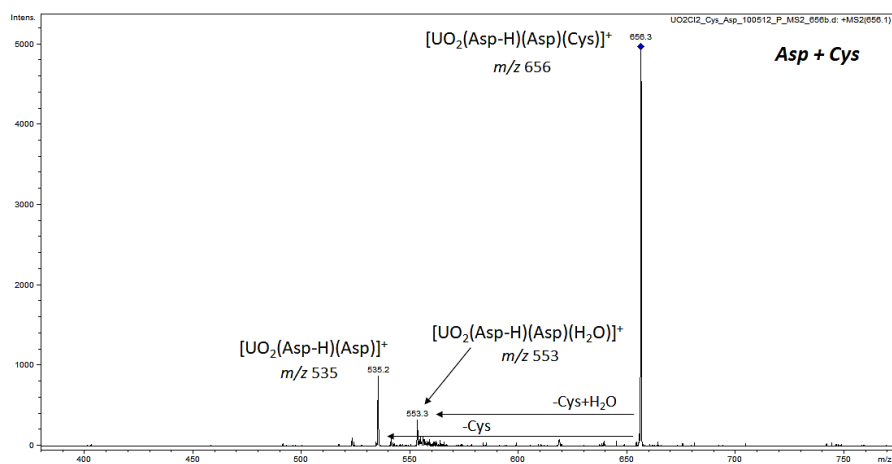

Figure S44. CID mass spectrum of  $[\text{UO}_2(\text{Asp-H})(\text{Asp})(\text{Cys})]^+$ .

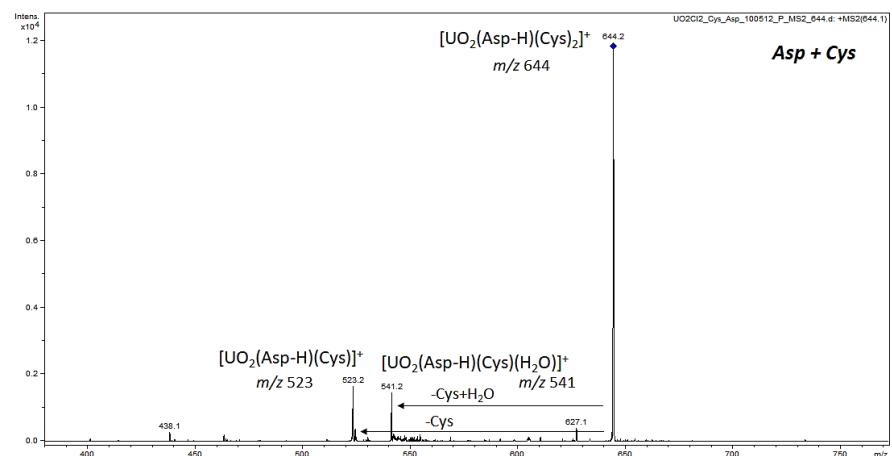

Figure S45. CID mass spectrum of  $[\text{UO}_2(\text{Asp-H})(\text{Cys})_2]^+$ .

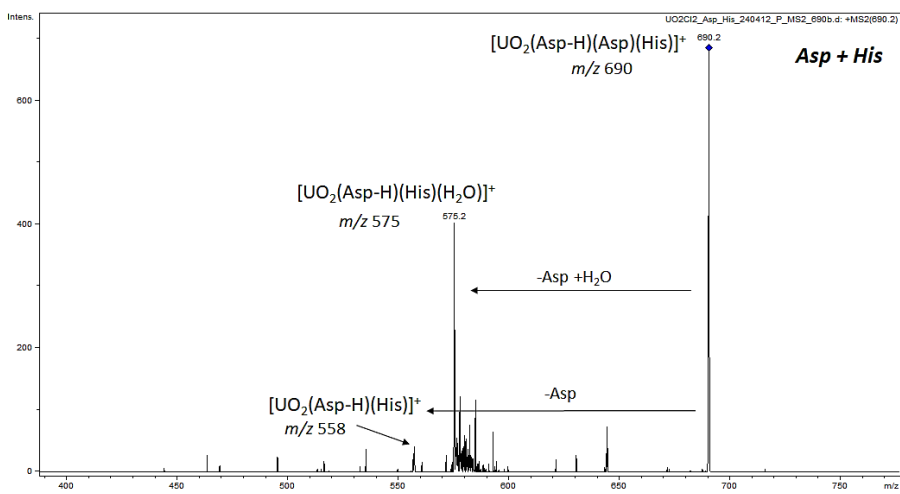

Figure S46. CID mass spectrum of  $[\text{UO}_2(\text{Asp-H})(\text{Asp})(\text{His})]^+$ .

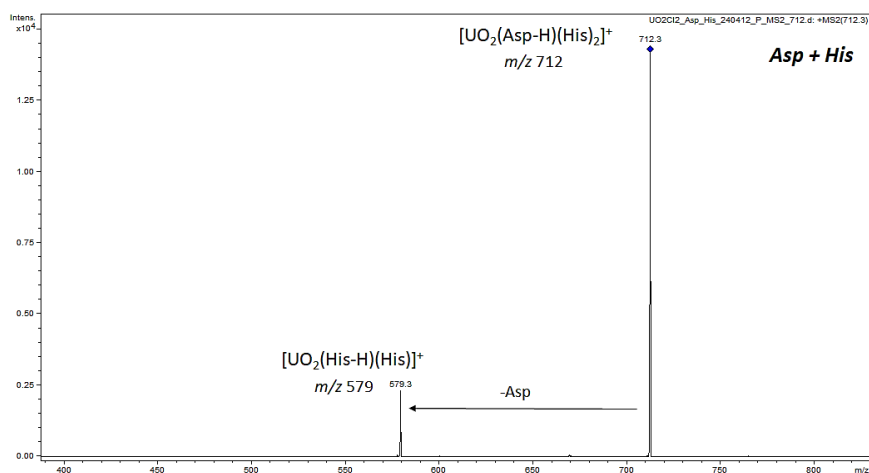

Figure S47. CID mass spectrum of  $[\text{UO}_2(\text{Asp-H})(\text{His})_2]^+$ .

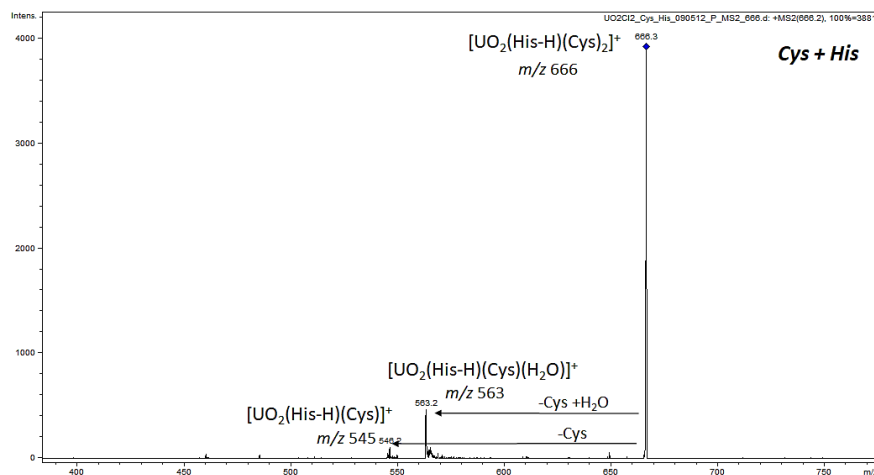

Figure S48. CID mass spectrum of  $[\text{UO}_2(\text{His-H})(\text{Cys})_2]^+$ .

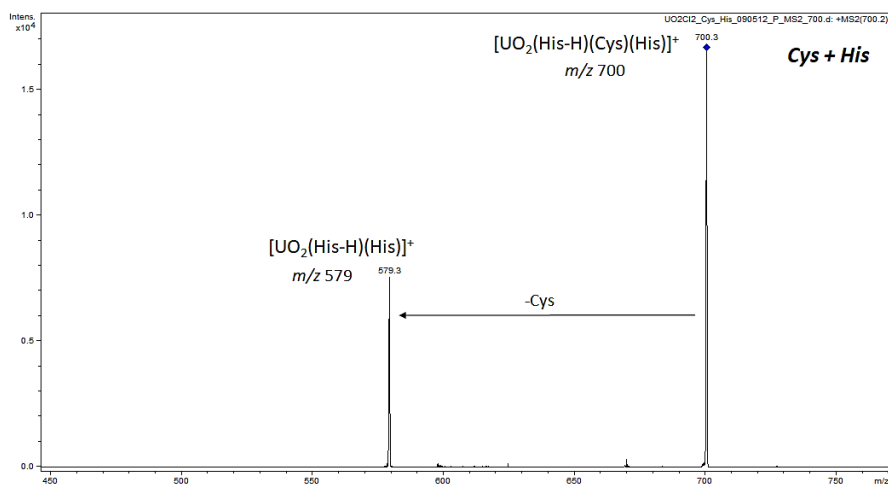

Figure S49. CID mass spectrum of  $[\text{UO}_2(\text{His-H})(\text{Cys})(\text{His})]^+$ .

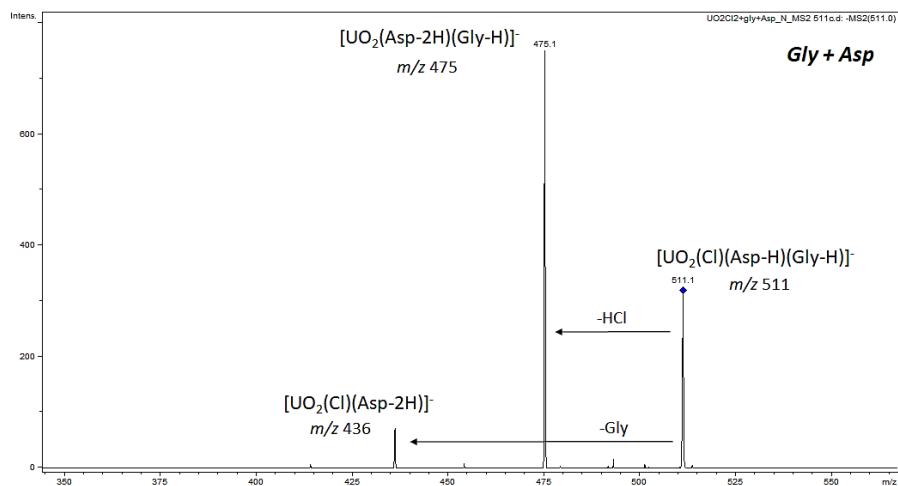

**Figure S50.** CID mass spectrum of  $[\text{UO}_2(\text{Cl})(\text{Asp-H})(\text{Gly-H})]^-$ .

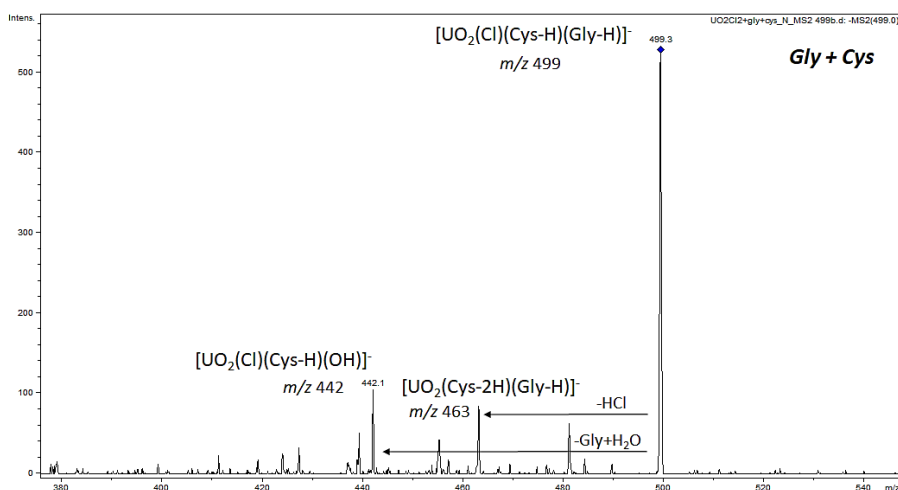

**Figure S51.** CID mass spectrum of  $[\text{UO}_2(\text{Cl})(\text{Cys-H})(\text{Gly-H})]^-$ .

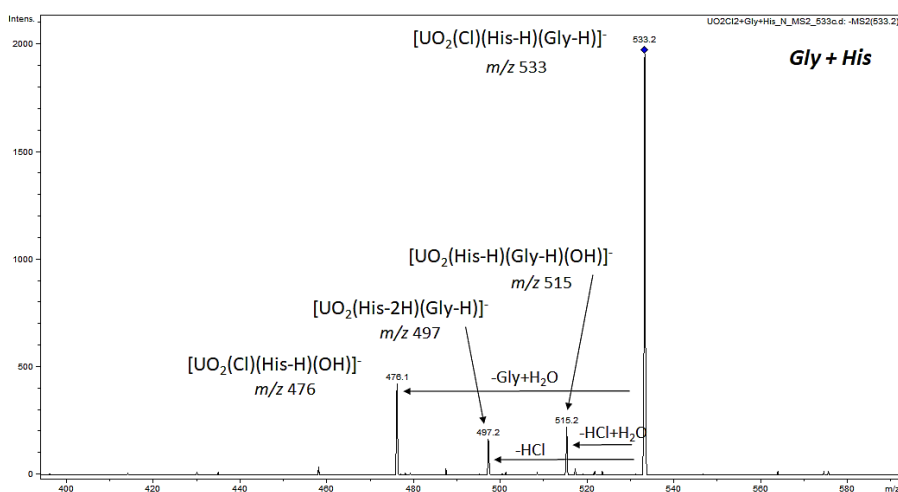

**Figure S52.** CID mass spectrum of  $[\text{UO}_2(\text{Cl})(\text{His-H})(\text{Gly-H})]^-$ .

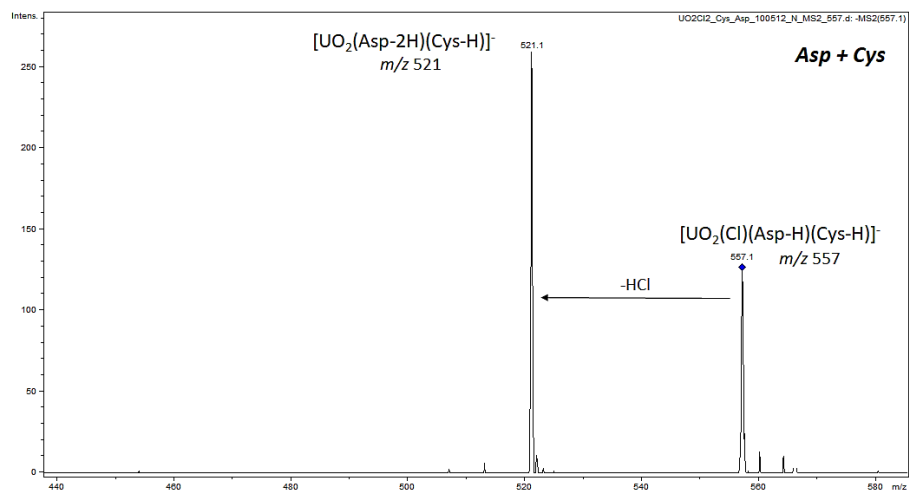

**Figure S53.** CID mass spectrum of  $[\text{UO}_2(\text{Cl})(\text{Asp-H})(\text{Cys-H})]^-$ .

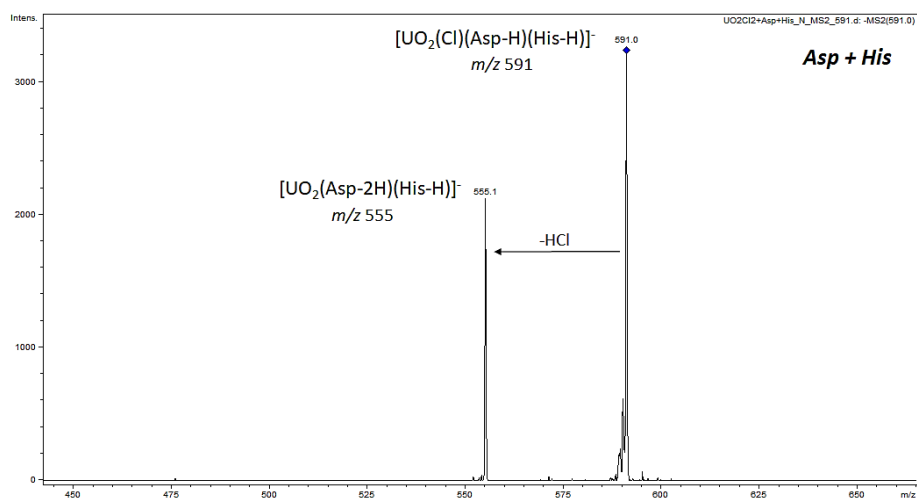

**Figure S54.** CID mass spectrum of  $[\text{UO}_2(\text{Cl})(\text{Asp-H})(\text{His-H})]^-$ .

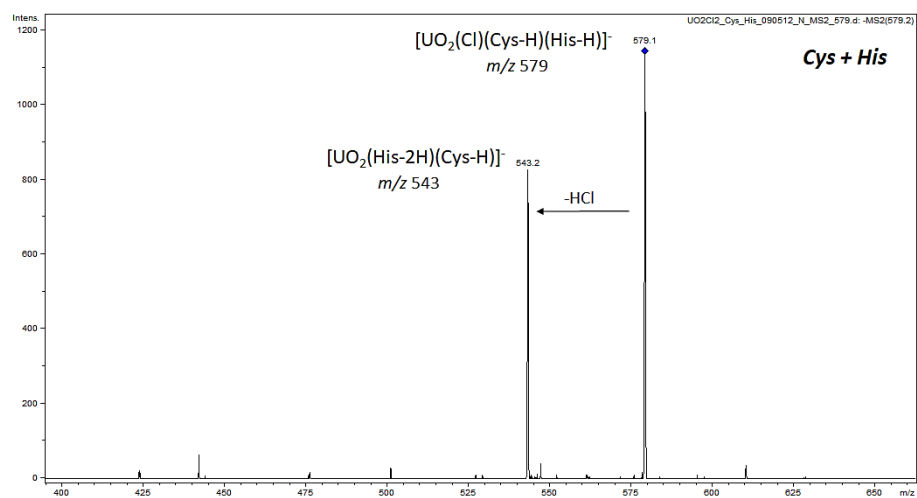

**Figure S55.** CID mass spectrum of  $[\text{UO}_2(\text{Cl})(\text{Cys-H})(\text{His-H})]^-$ .

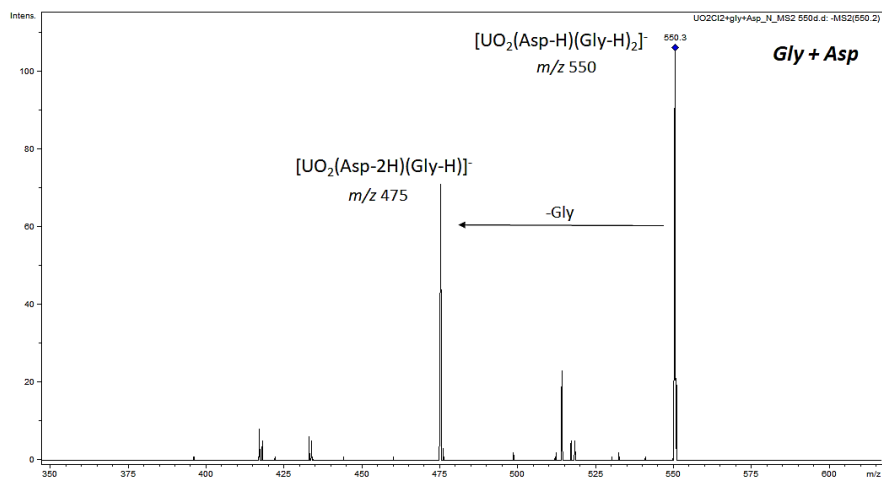

Figure S56. CID mass spectrum of  $[\text{UO}_2(\text{Asp-H})(\text{Gly-H})_2]^-$ .

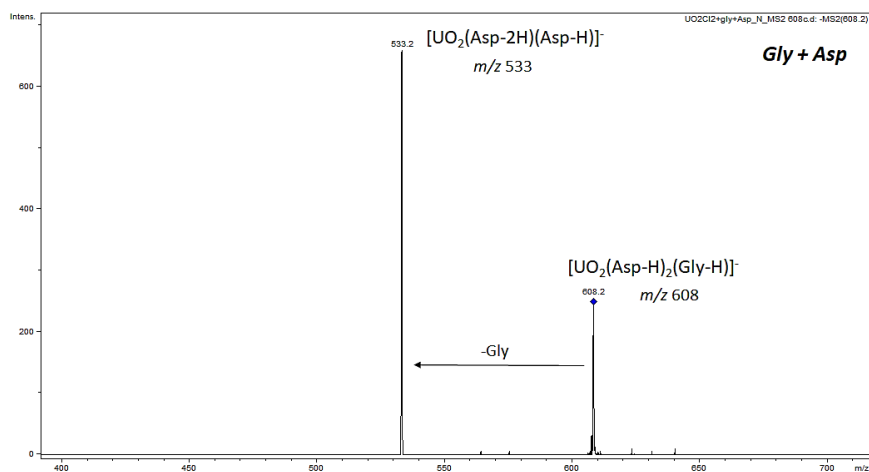

Figure S57. CID mass spectrum of  $[\text{UO}_2(\text{Asp-H})_2(\text{Gly-H})]^-$ .

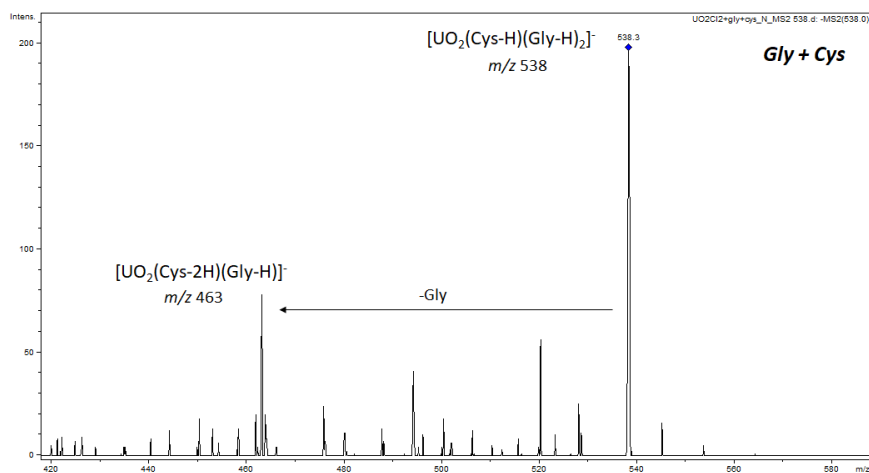

Figure S58. CID mass spectrum of  $[\text{UO}_2(\text{Cys-H})(\text{Gly-H})_2]^-$ .



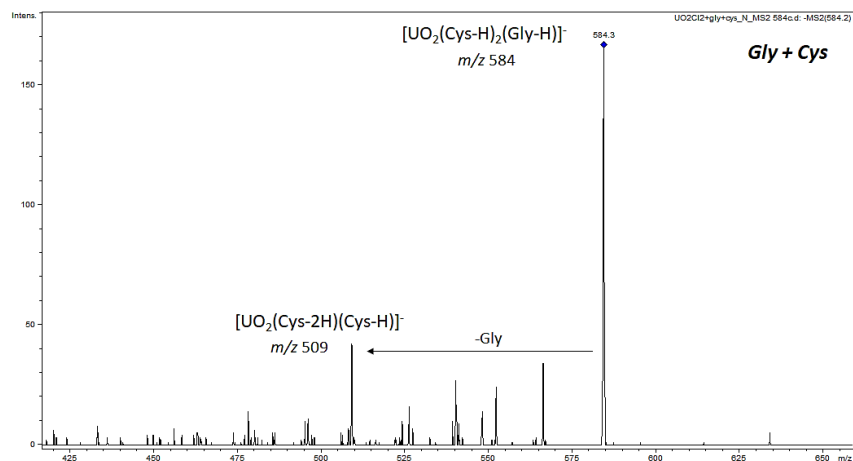

Figure S59. CID mass spectrum of  $[\text{UO}_2(\text{Cys-H})_2(\text{Gly-H})]^-$ .

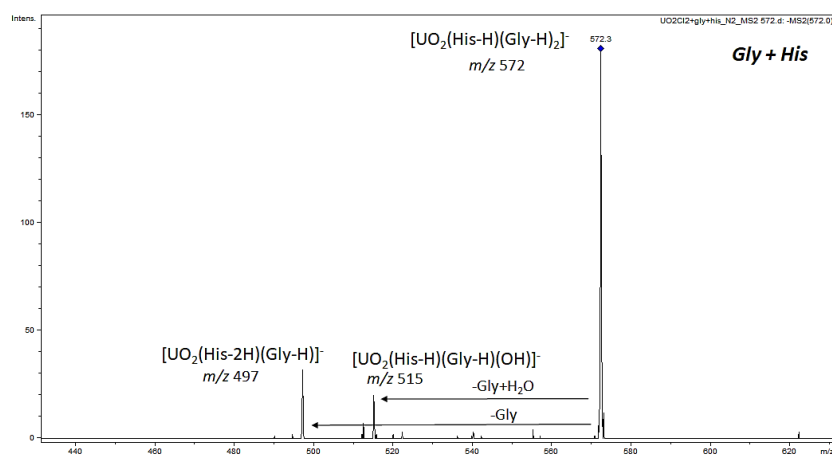

Figure S60. CID mass spectrum of  $[\text{UO}_2(\text{His-H})(\text{Gly-H})_2]^-$ .

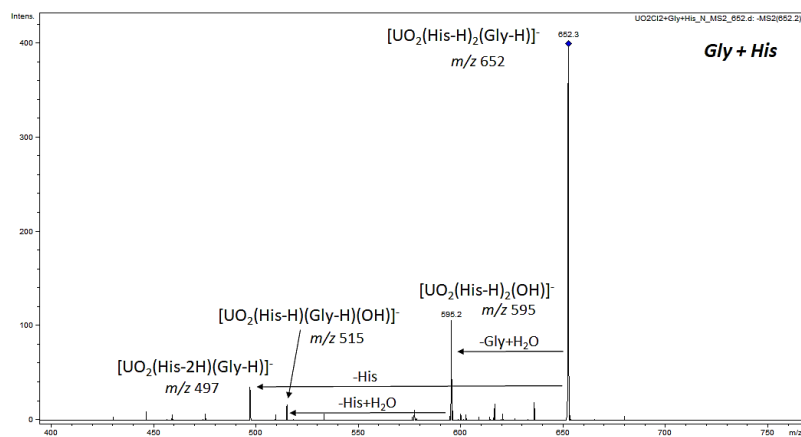

Figure S61. CID mass spectrum of  $[\text{UO}_2(\text{His-H})_2(\text{Gly-H})]^-$ .

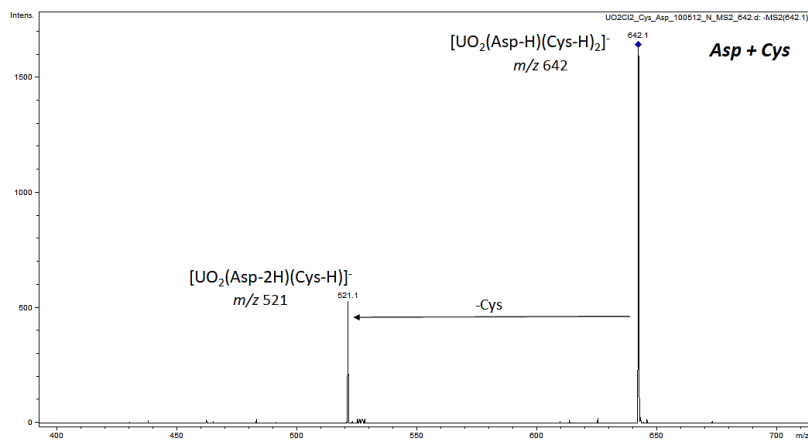

**Figure S62.** CID mass spectrum of  $[\text{UO}_2(\text{Asp-H})(\text{Cys-H})_2]^-$ .

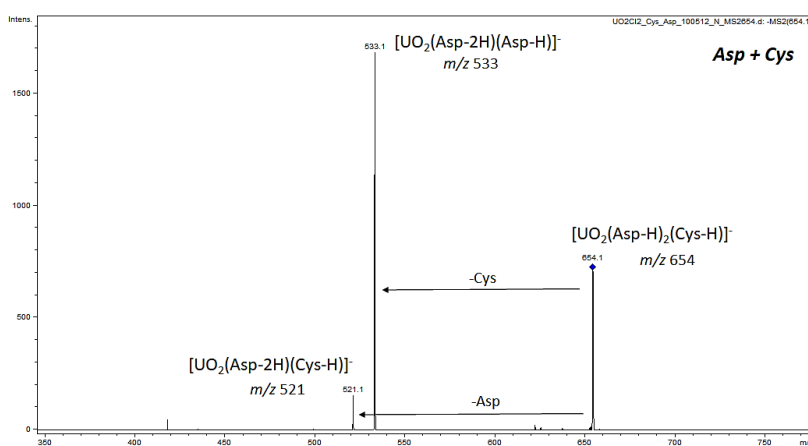

**Figure S63.** CID mass spectrum of  $[\text{UO}_2(\text{Asp-H})_2(\text{Cys-H})]^-$ .

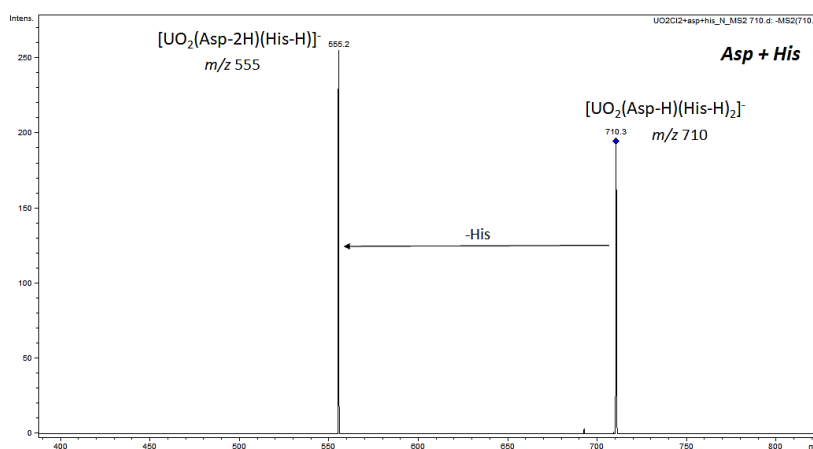

**Figure S64.** CID mass spectrum of  $[\text{UO}_2(\text{Asp-H})(\text{His-H})_2]^-$ .

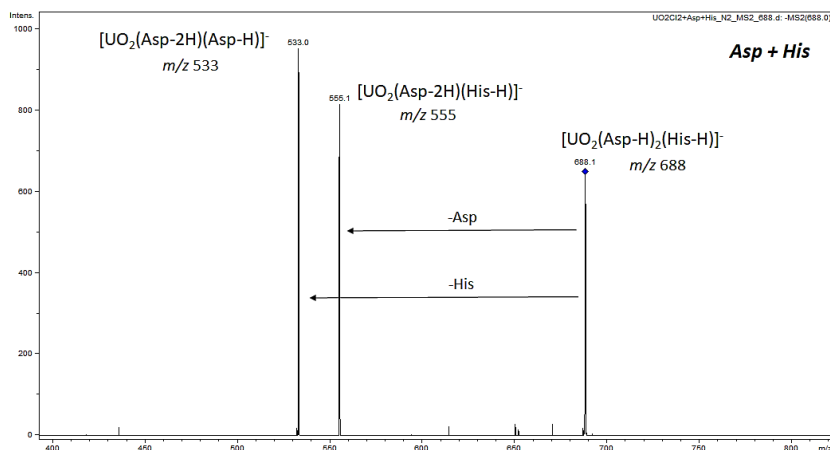

Figure S65. CID mass spectrum of  $[\text{UO}_2(\text{Asp-H})_2(\text{His-H})]^-$ .

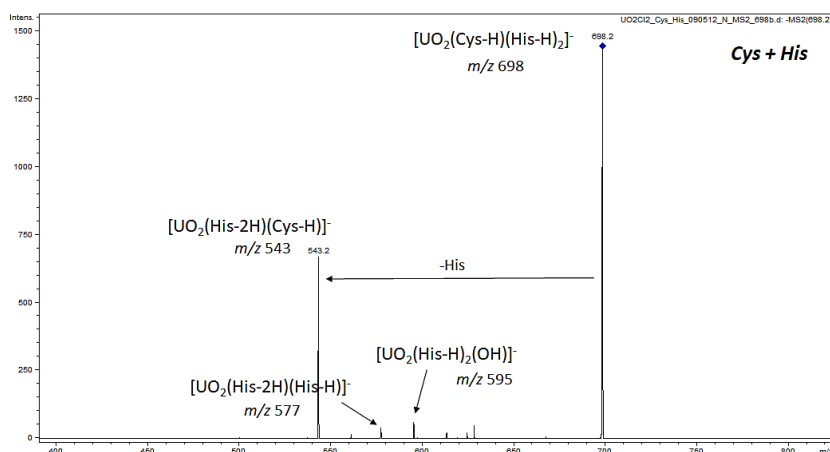

Figure S66. CID mass spectrum of  $[\text{UO}_2(\text{Cys-H})(\text{His-H})_2]^-$ .

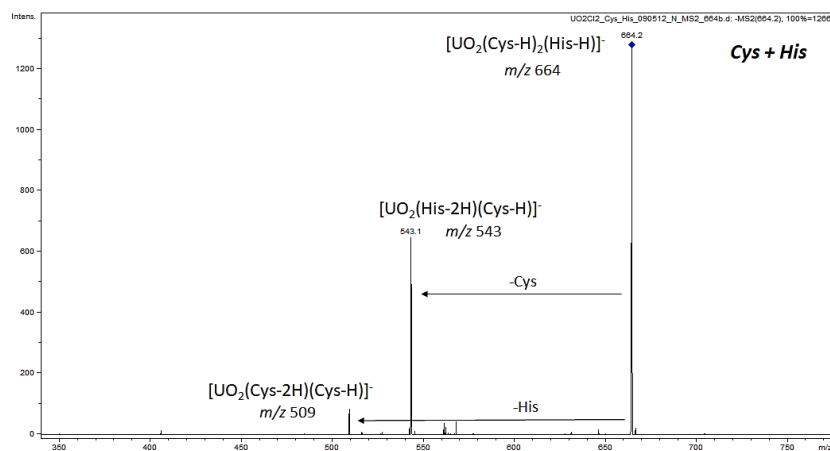

Figure S67. CID mass spectrum of  $[\text{UO}_2(\text{Cys-H})_2(\text{His-H})]^-$ .
